# Supplementary material for: Differentially methylated regions in maternal and paternal uniparental disomy for chromosome 7
Source: PubMed Central journal article supplement — Epigenetics. 2013 Nov 18;9(3):351–65. doi: 10.4161/epi.27160 (PMC4053454; doi:10.4161/epi.27160), 2013-11-18
Supplement: epi-9-351-s01.pdf [file epi-9-351-s01.pdf]

## **Supplemental Material to:**

**Katariina Hannula-Jouppi, Mari Muurinen, Marita  
Lipsanen-Nyman, Lovisa E Reinius, Sini Ezer, Dario Greco,  
and Juha Kere**

**Differentially methylated regions in maternal and paternal  
uniparental disomy for chromosome 7**

**Epigenetics 2013; 9(3)**

**<http://dx.doi.org/10.4161/epi.27160>**

**[http://www.landesbioscience.com/journals/epigenetics/  
article/27160/](http://www.landesbioscience.com/journals/epigenetics/article/27160/)**

### A. *HOXA4*

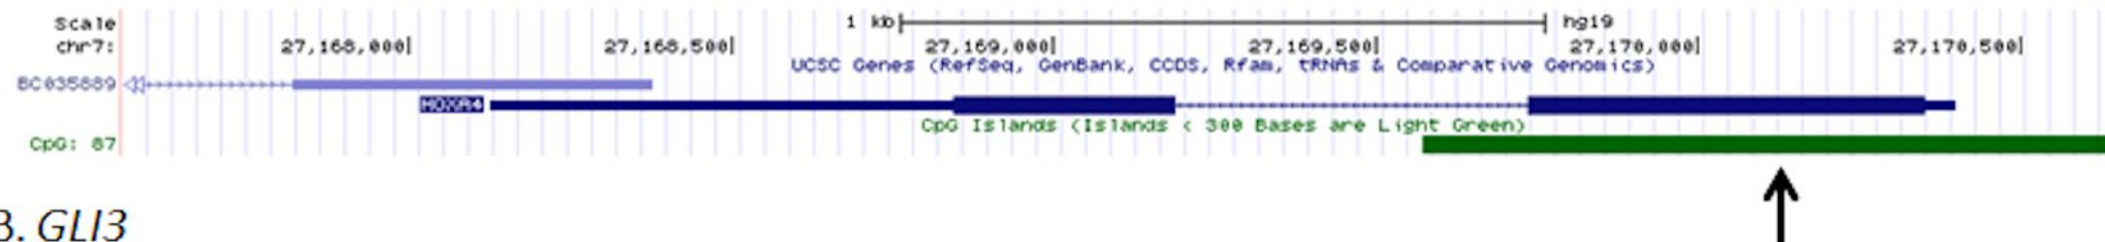

### B. *GLI3*

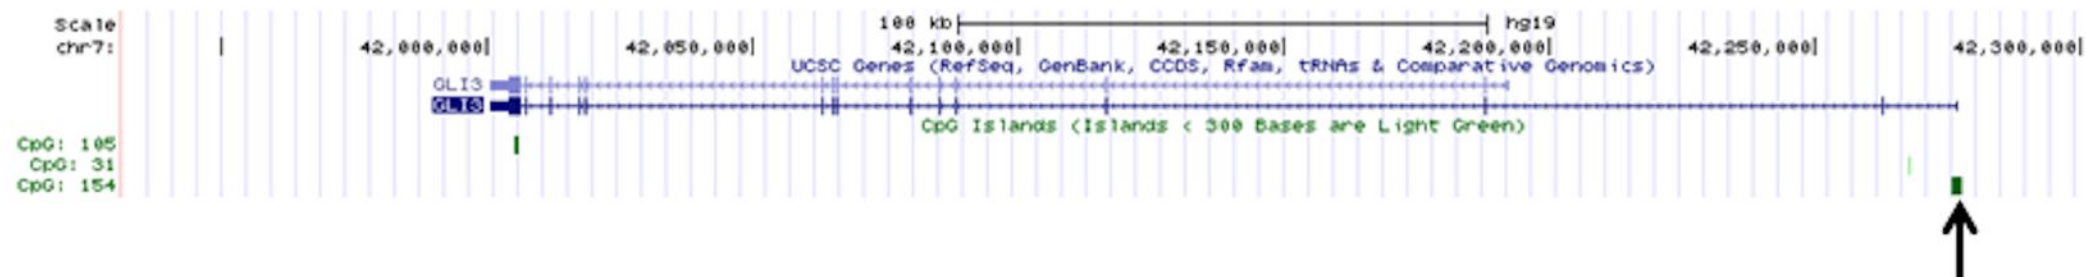

### C. *SVOPL*

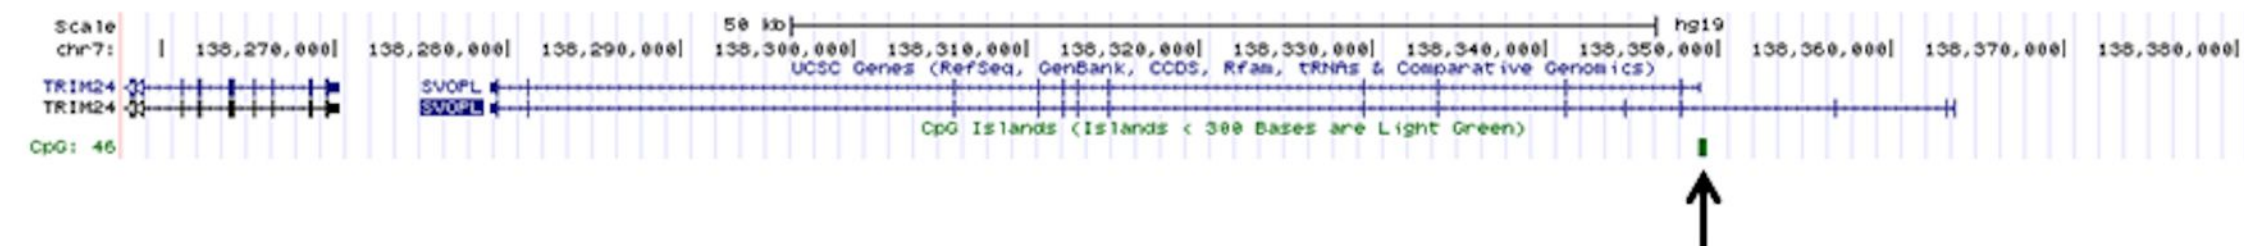

### D. *PEG10*

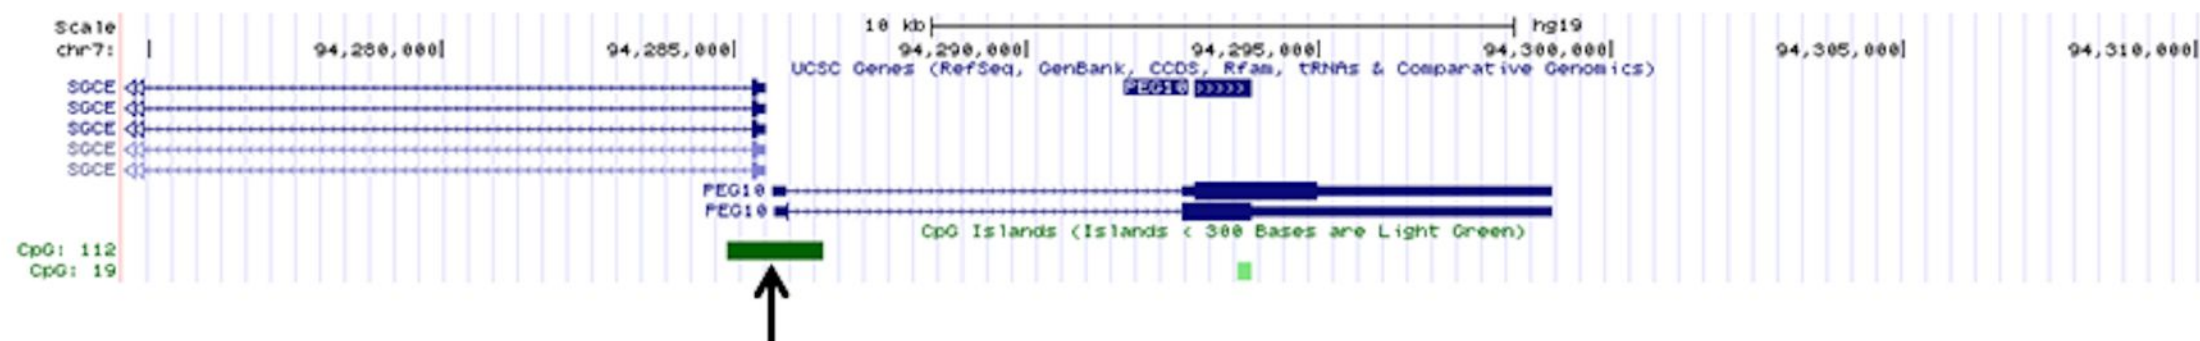

**Supplementary Figure 1.** Location of DMRs in relation to genes with imprinted expression. A. *HOXA4*, B. *GLI3*, C. *SVOPL*, and D. *PEG10*. The arrow indicates the CpG identified as a DMR. Plots are according to the UCSC genome browser.



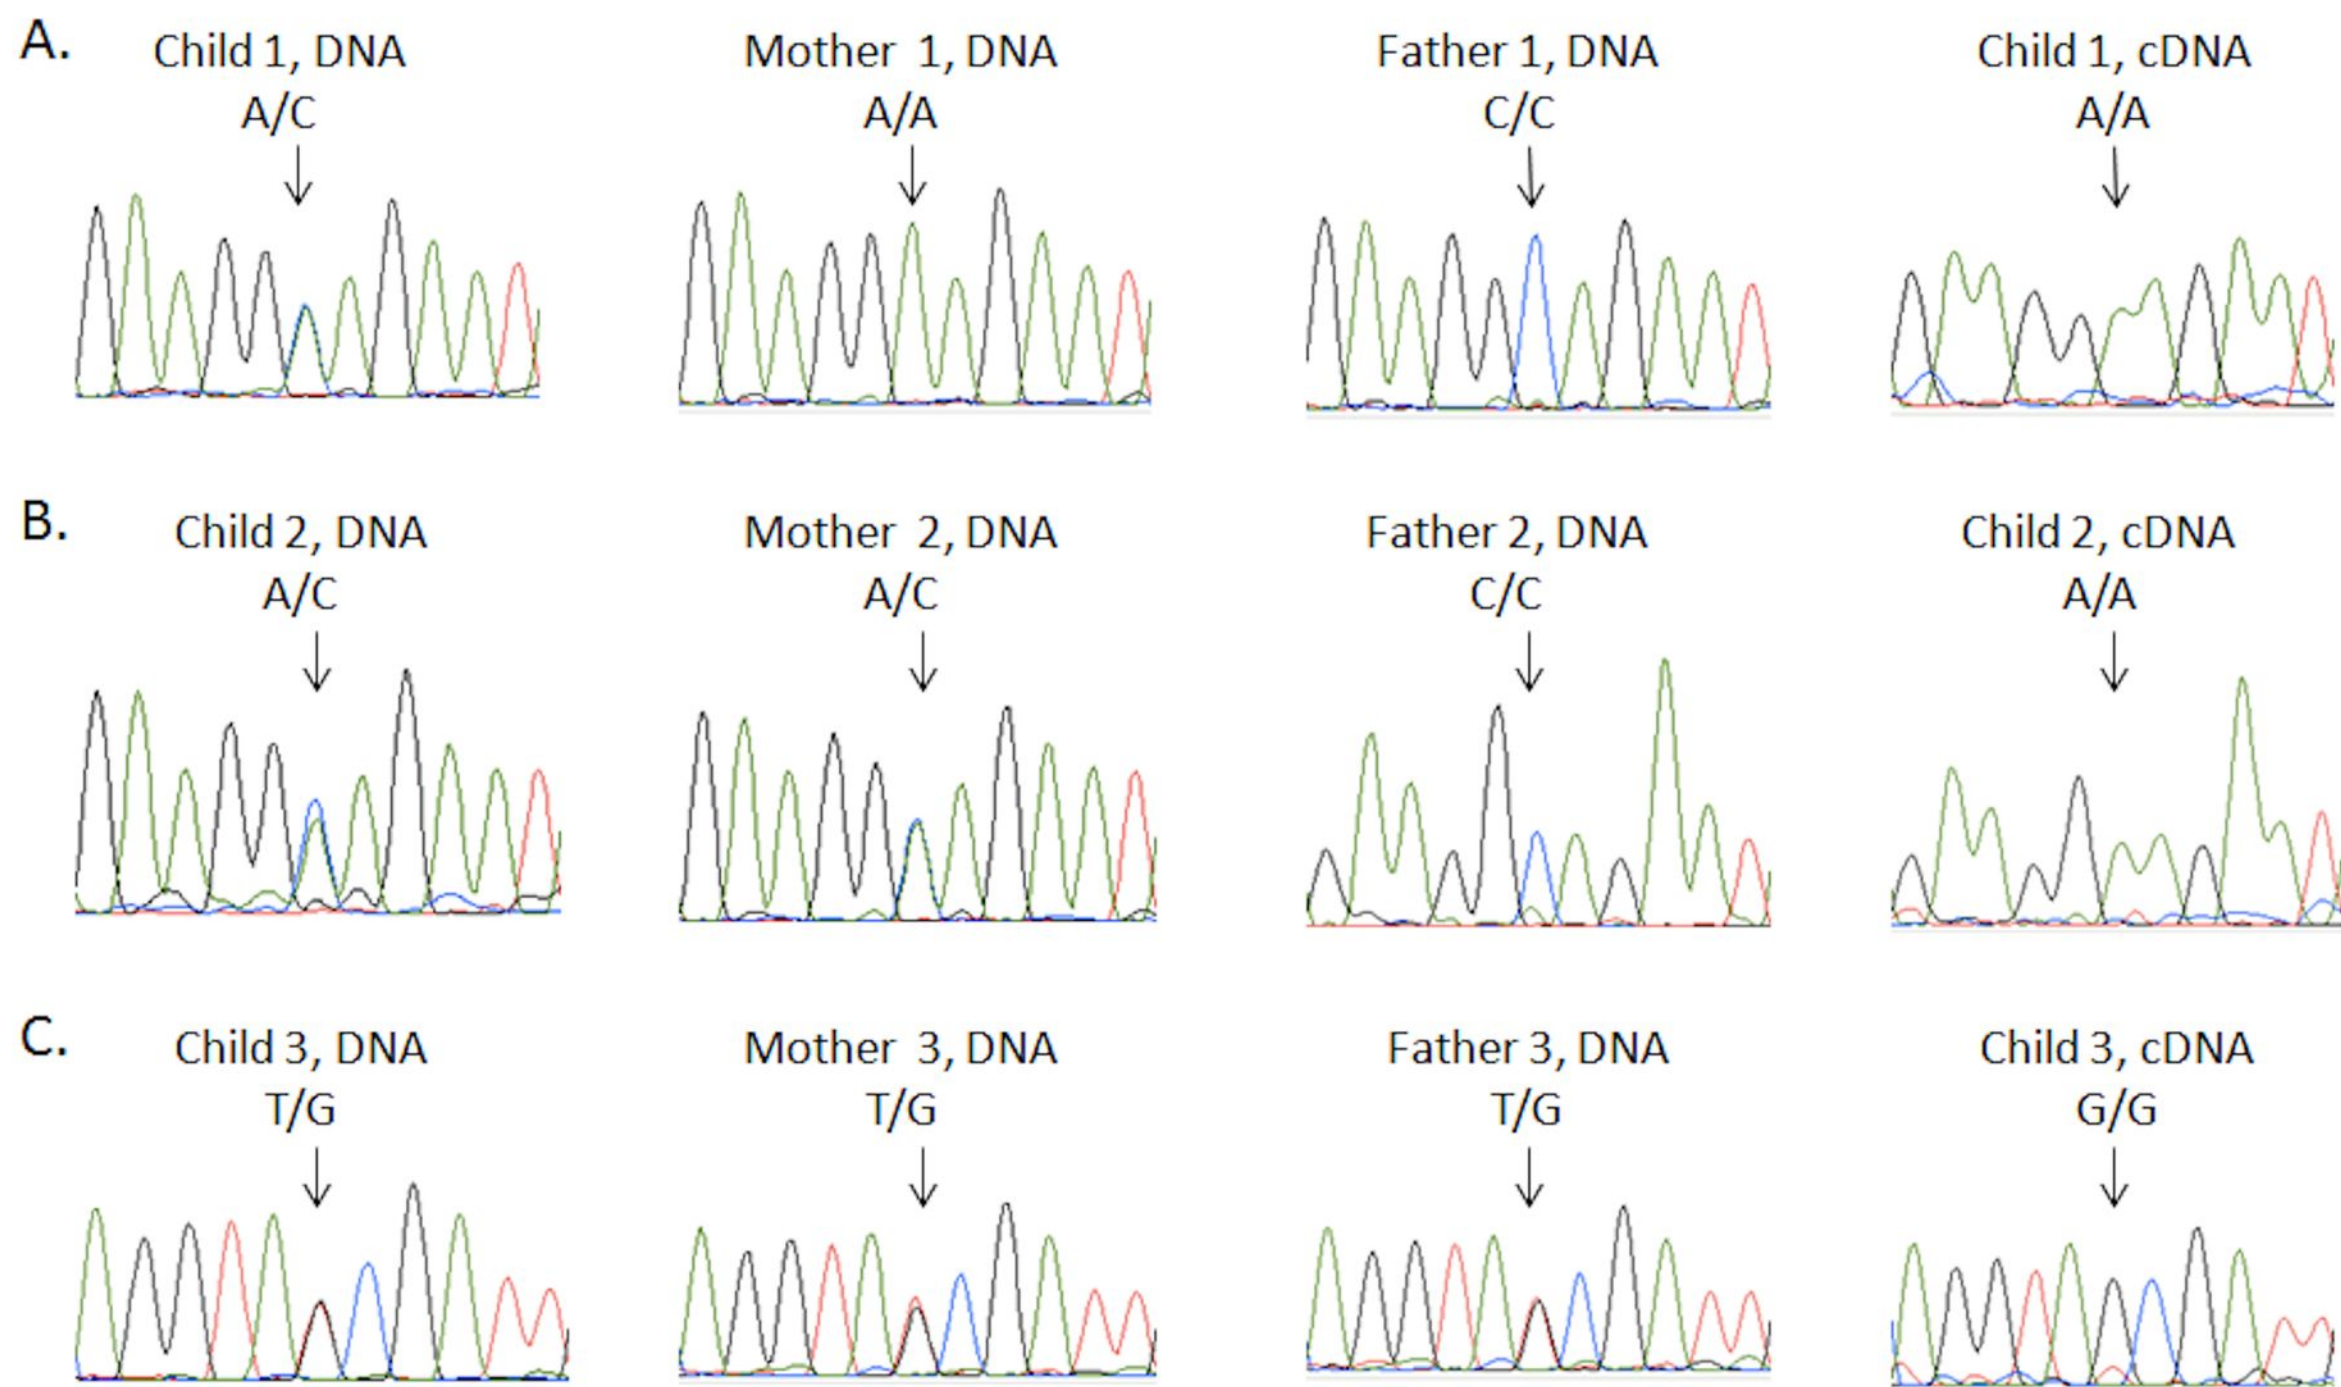

**Supplementary Figure 2.** Imprinted expression of *SVOPL* from the maternal allele and monoallelic expression of *HOXA4*. Child 1 (A.) and child 2 (B.), were heterozygous for the *SVOPL* exonic SNP rs2305816 in genomic DNA. Sequencing of the children's cDNA showed that only the maternal allele was expressed. Child 3 (C.) was heterozygous for the *HOXA4* exonic SNP rs2158218 in genomic DNA, and cDNA sequencing showed monoallelic expression.

**Supplementary Table 1.** Maternally hypermethylated CpGs that passed filters one and two. Start and end coordinates are  $\pm 25$ bp from Illumina MAPINFO.

| UCSC REFGENE NAME | UCSC REFGENE ACCESSION                                                       | START bp | END bp   |
|-------------------|------------------------------------------------------------------------------|----------|----------|
|                   |                                                                              | 31442    | 31492    |
|                   |                                                                              | 75629    | 75679    |
| HEATR2;PRKAR1B    | NM_017802;NM_001164760;NM_001164759;NM_001164758                             | 766298   | 766348   |
| C7orf50           | NM_001134395;NM_032350;NM_001134396                                          | 1076031  | 1076081  |
| GPER;C7orf50      | NM_001039966; NM_001134395;<br>NM_001505;NM_032350;NM_001134396;NM_001098201 | 1126736  | 1126786  |
| INTS1             | NM_001080453                                                                 | 1531680  | 1531730  |
| INTS1             | NM_001080453                                                                 | 1543981  | 1544031  |
| MAFK              | NM_002360                                                                    | 1576991  | 1577041  |
|                   |                                                                              | 1661574  | 1661624  |
|                   |                                                                              | 1792753  | 1792803  |
| MAD1L1            | NM_003550;NM_001013837;NM_001013836                                          | 2048735  | 2048785  |
| IQCE              | NM_001100390;NM_152558                                                       | 2637991  | 2638041  |
| IQCE              | NM_001100390;NM_152558                                                       | 2646930  | 2646980  |
| IQCE              | NM_001100390;NM_152558                                                       | 2647014  | 2647064  |
| IQCE              | NM_001100390;NM_152558                                                       | 2647827  | 2647877  |
| AMZ1              | NM_133463                                                                    | 2740177  | 2740227  |
| SDK1              | NM_152744                                                                    | 4150728  | 4150778  |
| SDK1              | NR_027816;NM_152744                                                          | 4228750  | 4228800  |
| SDK1              | NR_027816;NM_152744                                                          | 4230118  | 4230168  |
| SDK1              | NR_027816;NM_152744                                                          | 4260942  | 4260992  |
| SDK1              | NR_027816;NM_152744                                                          | 4303168  | 4303218  |
| RADIL             | NM_018059                                                                    | 4858242  | 4858292  |
| RADIL             | NM_018059                                                                    | 4862324  | 4862374  |
| PAPOLB;RADIL      | NM_020144;NM_018059                                                          | 4901773  | 4901823  |
|                   |                                                                              | 5275969  | 5276019  |
| SLC29A4           | NM_153247;NM_001040661                                                       | 5336688  | 5336738  |
|                   |                                                                              | 5599880  | 5599930  |
| CYTH3             | NM_004227                                                                    | 6204838  | 6204888  |
| C7orf70           | NM_001037163                                                                 | 6388713  | 6388763  |
| ZNF12             | NM_016265;NM_006956                                                          | 6746625  | 6746675  |
| THSD7A            | NM_015204                                                                    | 11871510 | 11871560 |
| ETV1              | NM_001163148;NM_004956;NM_001163149;NM_001163147                             | 14028990 | 14029040 |
| ETV1              | NM_001163148;NM_004956;NM_001163149;NM_001163147                             | 14030102 | 14030152 |
| ETV1              | NM_001163148;NM_004956;NM_001163147;<br>NM_001163149                         | 14030997 | 14031047 |
| DGKB              | NM_145695;NM_004080                                                          | 14380756 | 14380806 |
|                   |                                                                              | 16890744 | 16890794 |
| AHR               | NM_001621                                                                    | 17338235 | 17338285 |
| PRPS1L1           | NM_175886                                                                    | 18067483 | 18067533 |
|                   |                                                                              | 21370287 | 21370337 |
| RAPGEF5           | NM_012294                                                                    | 22193576 | 22193626 |
| RAPGEF5           | NM_012294                                                                    | 22371005 | 22371055 |
|                   |                                                                              | 22629449 | 22629499 |
| RPS2P32           | NR_026676                                                                    | 23529974 | 23530024 |
| RPS2P32           | NR_026676                                                                    | 23530215 | 23530265 |
| RPS2P32           | NR_026676                                                                    | 23530424 | 23530474 |
| RPS2P32           | NR_026676                                                                    | 23530608 | 23530658 |
| RPS2P32           | NR_026676                                                                    | 23530664 | 23530714 |
| RPS2P32           | NR_026676                                                                    | 23530785 | 23530835 |

|                 |                                                                   |          |          |
|-----------------|-------------------------------------------------------------------|----------|----------|
| NPY             | NM_000905                                                         | 24325346 | 24325396 |
| C7orf31         | NM_138811                                                         | 25219815 | 25219865 |
| NFE2L3          | NM_004289                                                         | 26193084 | 26193134 |
| HOXA5           | NM_019102                                                         | 27181646 | 27181696 |
| HOXA5           | NM_019102                                                         | 27183661 | 27183711 |
| HOXA5           | NM_019102                                                         | 27183669 | 27183719 |
| HOXA5           | NM_019102                                                         | 27183921 | 27183971 |
| HOXA5           | NM_019102                                                         | 27183948 | 27183998 |
| HOXA5           | NM_019102                                                         | 27184084 | 27184134 |
| HOXA5           | NM_019102                                                         | 27184151 | 27184201 |
| HOXA6           | NM_024014                                                         | 27185257 | 27185307 |
| HOXA6           | NM_024014                                                         | 27185487 | 27185537 |
| HOXA6           | NM_024014                                                         | 27186651 | 27186701 |
| HOXA6           | NM_024014                                                         | 27186968 | 27187018 |
| HOXA11AS;HOXA11 | NR_002795;NM_005523                                               | 27224286 | 27224336 |
| CREB5           | NM_004904;NM_182899;NM_182898                                     | 28507854 | 28507904 |
|                 |                                                                   | 29599870 | 29599920 |
| ZNRF2           | NM_147128                                                         | 30324557 | 30324607 |
| RP9             | NM_203288                                                         | 33146783 | 33146833 |
|                 |                                                                   | 34521620 | 34521670 |
|                 |                                                                   | 35578485 | 35578535 |
| SEPT7           | NM_001011553;NM_001788                                            | 35840488 | 35840538 |
| SFRP4           | NM_003014                                                         | 37955598 | 37955648 |
|                 |                                                                   | 38350439 | 38350489 |
| C7orf10         | NM_024728                                                         | 40819144 | 40819194 |
| GLI3            | NM_000168                                                         | 42195850 | 42195900 |
| HECW1           | NM_015052                                                         | 43204481 | 43204531 |
| HECW1           | NM_015052                                                         | 43300717 | 43300767 |
| HECW1           | NM_015052                                                         | 43577009 | 43577059 |
| C7orf44         | NM_018224                                                         | 43768771 | 43768821 |
| POLM            | NM_013284                                                         | 44122045 | 44122095 |
| PPIA            | NM_021130                                                         | 44836116 | 44836166 |
|                 |                                                                   | 44965368 | 44965418 |
| IKZF1           | NM_006060                                                         | 50344446 | 50344496 |
| GRB10           | NM_001001555                                                      | 50849614 | 50849664 |
| GRB10           | NM_001001555                                                      | 50849698 | 50849748 |
| GRB10           | NM_001001555                                                      | 50849780 | 50849830 |
| GRB10           | NM_001001555                                                      | 50849906 | 50849956 |
| GRB10           | NM_001001555                                                      | 50850539 | 50850589 |
| GRB10           | NM_001001555                                                      | 50850845 | 50850895 |
|                 |                                                                   | 51050569 | 51050619 |
|                 |                                                                   | 51456774 | 51456824 |
|                 |                                                                   | 55022542 | 55022592 |
|                 |                                                                   | 55955133 | 55955183 |
| SUMF2           | NM_001042470;NM_001042469;NM_001146333;<br>NM_001130069;NM_015411 | 56147232 | 56147282 |
| PHKG1           | NM_006213                                                         | 56160886 | 56160936 |
| CHCHD2          | NM_016139                                                         | 56172465 | 56172515 |
|                 |                                                                   | 56879076 | 56879126 |
|                 |                                                                   | 56951312 | 56951362 |
| LOC642006       | NR_030766                                                         | 57247682 | 57247732 |
|                 |                                                                   | 63217196 | 63217246 |
|                 |                                                                   | 64300406 | 64300456 |
|                 |                                                                   | 64333113 | 64333163 |
|                 |                                                                   | 65037695 | 65037745 |
| GUSB            | NM_000181                                                         | 65447113 | 65447163 |
| TPST1           | NM_003596                                                         | 65746827 | 65746877 |
|                 |                                                                   | 66751232 | 66751282 |

|                |                                                               |          |          |
|----------------|---------------------------------------------------------------|----------|----------|
| PMS2L4;STAG3L4 | NR_022007;NM_022906                                           | 66767484 | 66767534 |
| AUTS2          | NM_015570;NM_001127231                                        | 70159315 | 70159365 |
| TBL2           | NM_012453                                                     | 72992697 | 72992747 |
|                |                                                               | 73270230 | 73270280 |
| ELN            | NM_001081752;NM_000501;NM_001081754;NM_001081753;NM_001081755 | 73441809 | 73441859 |
| GATSL2         | NM_001145064                                                  | 74867577 | 74867627 |
| POR            | NM_000941                                                     | 75544336 | 75544386 |
|                |                                                               | 75799619 | 75799669 |
| SRRM3          | NM_001110199                                                  | 75831207 | 75831257 |
| YWHAG          | NM_012479                                                     | 75959178 | 75959228 |
| TMEM60;PHTF2   | NM_032936;NM_001127360;NM_001127358                           | 77427705 | 77427755 |
| PHTF2;TMEM60   | NM_001127360;NM_001127358;NM_032936                           | 77427828 | 77427878 |
| PCLO           | NM_014510;NM_033026                                           | 82792320 | 82792370 |
| DMTF1          | NM_001142327;NM_021145;NM_001142326;NR_024550;NR_024549       | 86781733 | 86781783 |
| CLDN12         | NM_012129                                                     | 90031324 | 90031374 |
| AKAP9          | NM_005751;NM_147185                                           | 91569941 | 91569991 |
|                |                                                               | 92175070 | 92175120 |
| CDK6           | NM_001145306                                                  | 92466142 | 92466192 |
| GNGT1          | NM_021955                                                     | 93540109 | 93540159 |
| SGCE;PEG10     | NM_001099400;NM_001040152;NM_001099401;NM_015068;NM_003919    | 94285372 | 94285422 |
| SGCE;PEG10     | NM_001099400;NM_015068;NM_001040152;NM_003919;NM_001099401    | 94285495 | 94285545 |
| SGCE;PEG10     | NM_015068;NM_001040152;NM_001099400;NM_001099401;NM_003919    | 94285617 | 94285667 |
| SGCE;PEG10     | NM_015068;NM_001040152;NM_001099400;NM_001099401;NM_003919    | 94285647 | 94285697 |
| SGCE;PEG10     | NM_015068;NM_001040152;NM_001099400;NM_001099401;NM_003919    | 94285660 | 94285710 |
| SGCE;PEG10     | NM_015068;NM_001040152;NM_001099400;NM_001099401;NM_003919    | 94285687 | 94285737 |
| SGCE;PEG10     | NM_001099401;NM_015068;NM_001040152;NM_001099400;NM_003919    | 94285720 | 94285770 |
| SGCE;PEG10     | NM_001099401;NM_015068;NM_001040152;NM_001099400;NM_003919    | 94285734 | 94285784 |
| SGCE;PEG10     | NM_001099401;NM_015068;NM_001040152;NM_001099400;NM_003919    | 94285743 | 94285793 |
| SGCE;PEG10     | NM_001099401;NM_015068;NM_001040152;NM_001099400;NM_003919    | 94285752 | 94285802 |
| SGCE;PEG10     | NM_001099401;NM_015068;NM_001040152;NM_001099400;NM_003919    | 94285759 | 94285809 |
| SGCE;PEG10     | NM_001099401;NM_015068;NM_001040152;NM_001099400;NM_003919    | 94285789 | 94285839 |
| SGCE;PEG10     | NM_001099401;NM_015068;NM_001099400;NM_001040152;NM_003919    | 94285848 | 94285898 |
| SGCE;PEG10     | NM_001099401;NM_015068;NM_001099400;NM_001040152;NM_003919    | 94285862 | 94285912 |
| SGCE;PEG10     | NM_001099401;NM_015068;NM_001099400;NM_001040152;NM_003919    | 94285877 | 94285927 |
| SGCE;PEG10     | NM_001099401;NM_015068;NM_001099400;NM_001040152;NM_003919    | 94285886 | 94285936 |
| SGCE;PEG10     | NM_001099401;NM_015068;NM_001099400;NM_001040152;NM_003919    | 94285917 | 94285967 |
| SGCE;PEG10     | NM_001099401;NM_015068;NM_001099400;NM_001040152;NM_003919    | 94285926 | 94285976 |
| SGCE;PEG10     | NM_001099401;NM_015068;NM_001099400;NM_001040152;NM_003919    | 94285935 | 94285985 |

|            |                                                            |          |          |
|------------|------------------------------------------------------------|----------|----------|
| SGCE;PEG10 | NM_001099401;NM_015068;NM_001099400;NM_001040152;NM_003919 | 94285968 | 94286018 |
| SGCE;PEG10 | NM_001099401;NM_015068;NM_001099400;NM_001040152;NM_003919 | 94286061 | 94286111 |
| SGCE;PEG10 | NM_001099401;NM_015068;NM_001099400;NM_001040152;NM_003919 | 94286085 | 94286135 |
| SGCE;PEG10 | NM_001099401;NM_015068;NM_001099400;NM_001040152;NM_003919 | 94286106 | 94286156 |
| SGCE;PEG10 | NM_001099401;NM_015068;NM_001099400;NM_001040152;NM_003919 | 94286183 | 94286233 |
| SGCE;PEG10 | NM_001099401;NM_015068;NM_001099400;NM_001040152;NM_003919 | 94286194 | 94286244 |
| SGCE;PEG10 | NM_001099401;NM_015068;NM_001099400;NM_001040152;NM_003919 | 94286207 | 94286257 |
| SGCE;PEG10 | NM_001099401;NM_015068;NM_001099400;NM_001040152;NM_003919 | 94286218 | 94286268 |
| SGCE;PEG10 | NM_001099401;NM_015068;NM_001099400;NM_001040152;NM_003919 | 94286236 | 94286286 |
| SGCE;PEG10 | NM_001099401;NM_015068;NM_001099400;NM_001040152;NM_003919 | 94286238 | 94286288 |
| SGCE;PEG10 | NM_001099401;NM_015068;NM_001099400;NM_001040152;NM_003919 | 94286242 | 94286292 |
| SGCE;PEG10 | NM_001099401;NM_015068;NM_001099400;NM_001040152;NM_003919 | 94286269 | 94286319 |
| SGCE;PEG10 | NM_001099401;NM_015068;NM_001099400;NM_001040152;NM_003919 | 94286279 | 94286329 |
| SGCE;PEG10 | NM_001099401;NM_015068;NM_001099400;NM_001040152;NM_003919 | 94286318 | 94286368 |
| SGCE;PEG10 | NM_001099401;NM_015068;NM_001099400;NM_001040152;NM_003919 | 94286326 | 94286376 |
| SGCE;PEG10 | NM_001099401;NM_015068;NM_001099400;NM_001040152;NM_003919 | 94286337 | 94286387 |
| SGCE;PEG10 | NM_001099401;NM_015068;NM_001099400;NM_001040152;NM_003919 | 94286395 | 94286445 |
| SGCE;PEG10 | NM_001099401;NM_015068;NM_001099400;NM_001040152;NM_003919 | 94286406 | 94286456 |
| SGCE;PEG10 | NM_001099401;NM_015068;NM_001099400;NM_001040152;NM_003919 | 94286448 | 94286498 |
| SGCE;PEG10 | NM_001099401;NM_015068;NM_001099400;NM_001040152;NM_003919 | 94286459 | 94286509 |
| SGCE;PEG10 | NM_001099401;NM_015068;NM_001099400;NM_001040152;NM_003919 | 94286486 | 94286536 |
| SGCE;PEG10 | NM_001099401;NM_015068;NM_001099400;NM_001040152;NM_003919 | 94286496 | 94286546 |
| SGCE;PEG10 | NM_001099401;NM_015068;NM_001099400;NM_001040152;NM_003919 | 94286501 | 94286551 |
| SGCE;PEG10 | NM_001099401;NM_015068;NM_001099400;NM_001040152;NM_003919 | 94286534 | 94286584 |
| SGCE;PEG10 | NM_001099401;NM_015068;NM_001099400;NM_001040152;NM_003919 | 94286607 | 94286657 |
| SGCE;PEG10 | NM_001099401;NM_015068;NM_001099400;NM_001040152;NM_003919 | 94286625 | 94286675 |
| SGCE;PEG10 | NM_001099401;NM_015068;NM_001099400;NM_001040152;NM_003919 | 94286644 | 94286694 |
| SGCE;PEG10 | NM_001099401;NM_015068;NM_001099400;NM_001040152;NM_003919 | 94286728 | 94286778 |
| SGCE;PEG10 | NM_001099401;NM_015068;NM_001099400;NM_001040152;NM_003919 | 94286735 | 94286785 |
| SGCE;PEG10 | NM_001099401;NM_015068;NM_001099400;NM_001040152;NM_003919 | 94286768 | 94286818 |

|                   |                                                            |           |           |
|-------------------|------------------------------------------------------------|-----------|-----------|
|                   | 001040152;NM_003919                                        |           |           |
| SGCE;PEG10        | NM_001099401;NM_015068;NM_001099400;NM_001040152;NM_003919 | 94286809  | 94286859  |
| SGCE;PEG10        | NM_001099401;NM_015068;NM_001099400;NM_001040152;NM_003919 | 94286911  | 94286961  |
| SGCE;PEG10        | NM_001099401;NM_015068;NM_001099400;NM_001040152;NM_003919 | 94286928  | 94286978  |
| SGCE;PEG10        | NM_001099401;NM_015068;NM_001099400;NM_001040152;NM_003919 | 94286930  | 94286980  |
| PEG10             | NM_015068;NM_001040152                                     | 94287161  | 94287211  |
| PEG10             | NM_015068;NM_001040152                                     | 94287186  | 94287236  |
| PEG10             | NM_015068;NM_001040152                                     | 94287217  | 94287267  |
| PON3              | NM_000940                                                  | 95025804  | 95025854  |
|                   |                                                            | 96220160  | 96220210  |
| DLX6AS            | NR_015448                                                  | 96643661  | 96643711  |
| LMTK2             | NM_014916                                                  | 97836222  | 97836272  |
| NPTX2             | NM_002523                                                  | 98250000  | 98250050  |
| ARPC1A            | NM_006409                                                  | 98957303  | 98957353  |
| CPSF4;PTCD1       | NM_001081559;NM_006693;NM_015545                           | 99036816  | 99036866  |
| PILRB;PMS2L1      | NM_013440;NR_003613;NM_175047                              | 99933476  | 99933526  |
| C7orf47           | NM_145030                                                  | 100033913 | 100033963 |
|                   |                                                            | 100291866 | 100291916 |
| POP7              | NM_005837                                                  | 100303704 | 100303754 |
| EPHB4             | NM_004444                                                  | 100425050 | 100425100 |
|                   |                                                            | 101398127 | 101398177 |
|                   |                                                            | 101398152 | 101398202 |
| SPDYE6            | NM_001146210                                               | 101991164 | 101991214 |
| MLL5;LOC100216545 | NM_182931;NM_018682;NR_024586                              | 104654479 | 104654529 |
| NRCAM             | NM_001037133;NM_001037132;NM_005010                        | 107798522 | 107798572 |
| EIF3IP1           | NR_003024                                                  | 109600400 | 109600450 |
| DOCK4             | NM_014705                                                  | 111784453 | 111784503 |
| C7orf60           | NM_152556                                                  | 112579484 | 112579534 |
|                   |                                                            | 113726848 | 113726898 |
|                   |                                                            | 115995909 | 115995959 |
| ST7               | NM_018412;NM_021908                                        | 116638097 | 116638147 |
|                   |                                                            | 118741390 | 118741440 |
| C7orf58           | NM_001105533;NM_024913                                     | 120662768 | 120662818 |
| TAS2R16           | NM_016945                                                  | 122635001 | 122635051 |
|                   |                                                            | 122900122 | 122900172 |
|                   |                                                            | 123820715 | 123820765 |
|                   |                                                            | 123978156 | 123978206 |
| GRM8              | NM_001127323;NR_028041;NM_000845                           | 126829489 | 126829539 |
| ARF5              | NM_001662                                                  | 127228197 | 127228247 |
| SND1              | NM_014390                                                  | 127292198 | 127292248 |
| RBM28             | NM_001166135;NM_018077                                     | 127983875 | 127983925 |
| C7orf68           | NM_001098786;NM_013332                                     | 128095546 | 128095596 |
| METTL2B           | NM_018396                                                  | 128116942 | 128116992 |
| FLNC              | NM_001127487;NM_001458                                     | 128470888 | 128470938 |
| ATP6V1F           | NM_004231                                                  | 128502708 | 128502758 |
| ATP6V1F           | NM_004231                                                  | 128502865 | 128502915 |
| CPA2              | NM_001869                                                  | 129918022 | 129918072 |
| MEST              | NM_177524                                                  | 130125739 | 130125789 |
| MESTIT1;MEST      | NR_004382;NM_177524;NM_177525                              | 130129921 | 130129971 |
| MESTIT1;MEST      | NR_004382;NM_177524;NM_177525                              | 130130097 | 130130147 |
| MESTIT1;MEST      | NR_004382;NM_177524;NM_177525                              | 130130130 | 130130180 |
| MESTIT1;MEST      | NR_004382;NM_177524;NM_177525                              | 130130162 | 130130212 |
| MESTIT1;MEST      | NR_004382;NM_177524;NM_177525                              | 130130164 | 130130214 |
| MESTIT1;MEST      | NR_004382;NM_177524;NM_177525                              | 130130178 | 130130228 |



|              |                                         |           |           |
|--------------|-----------------------------------------|-----------|-----------|
| MESTIT1;MEST | NR_004382;NM_177524;NM_177525           | 130130263 | 130130313 |
| MESTIT1;MEST | NR_004382;NM_177524;NM_177525           | 130130295 | 130130345 |
| MESTIT1;MEST | NR_004382;NM_177524;NM_177525           | 130130358 | 130130408 |
| MESTIT1;MEST | NR_004382;NM_002402;NM_177524;NM_177525 | 130130453 | 130130503 |
| MESTIT1;MEST | NR_004382;NM_002402;NM_177524;NM_177525 | 130130456 | 130130506 |
| MESTIT1;MEST | NR_004382;NM_002402;NM_177524;NM_177525 | 130130563 | 130130613 |
| MESTIT1;MEST | NR_004382;NM_002402;NM_177524;NM_177525 | 130130571 | 130130621 |
| MESTIT1;MEST | NR_004382;NM_002402;NM_177524;NM_177525 | 130130715 | 130130765 |
| MESTIT1;MEST | NR_004382;NM_002402;NM_177524;NM_177525 | 130130722 | 130130772 |
| MESTIT1;MEST | NR_004382;NM_002402;NM_177524;NM_177525 | 130130728 | 130130778 |
| MESTIT1;MEST | NR_004382;NM_002402;NM_177524;NM_177525 | 130130893 | 130130943 |
| MESTIT1;MEST | NR_004382;NM_002402;NM_177525;NM_177524 | 130130970 | 130131020 |
| MESTIT1;MEST | NR_004382;NM_002402;NM_177525;NM_177524 | 130131060 | 130131110 |
| MESTIT1;MEST | NR_004382;NM_002402;NM_177525;NM_177524 | 130131111 | 130131161 |
| MESTIT1;MEST | NR_004382;NM_002402;NM_177525;NM_177524 | 130131113 | 130131163 |
| MESTIT1;MEST | NR_004382;NM_002402;NM_177525;NM_177524 | 130131121 | 130131171 |
| MESTIT1;MEST | NR_004382;NM_002402;NM_177524;NM_177525 | 130131164 | 130131214 |
| MEST;MESTIT1 | NM_002402;NM_177524;NM_177525;NR_004382 | 130131233 | 130131283 |
| MEST;MESTIT1 | NM_002402;NM_177524;NM_177525;NR_004382 | 130131243 | 130131293 |
| MEST;MESTIT1 | NM_002402;NM_177524;NM_177525;NR_004382 | 130131334 | 130131384 |
| MEST;MESTIT1 | NM_002402;NM_177524;NM_177525;NR_004382 | 130131342 | 130131392 |
| MEST;MESTIT1 | NM_002402;NM_177524;NM_177525;NR_004382 | 130131378 | 130131428 |
| MEST;MESTIT1 | NM_002402;NM_177524;NM_177525;NR_004382 | 130131455 | 130131505 |
| MEST;MESTIT1 | NM_002402;NM_177524;NM_177525;NR_004382 | 130131459 | 130131509 |
| MEST;MESTIT1 | NM_002402;NM_177524;NM_177525;NR_004382 | 130131541 | 130131591 |
| MEST;MESTIT1 | NM_002402;NM_177524;NM_177525;NR_004382 | 130131608 | 130131658 |
| MEST;MESTIT1 | NM_002402;NM_177524;NM_177525;NR_004382 | 130131651 | 130131701 |
| MEST;MESTIT1 | NM_002402;NM_177524;NM_177525;NR_004382 | 130131666 | 130131716 |
| MEST;MESTIT1 | NM_002402;NM_177524;NM_177525;NR_004382 | 130131684 | 130131734 |
| MEST;MESTIT1 | NM_002402;NM_177524;NM_177525;NR_004382 | 130131705 | 130131755 |
| MEST;MESTIT1 | NM_177524;NM_002402;NM_177525;NR_004382 | 130131772 | 130131822 |

|              |                                         |           |           |
|--------------|-----------------------------------------|-----------|-----------|
| MEST;MESTIT1 | NM_177524;NM_002402;NM_177525;NR_004382 | 130131801 | 130131851 |
| MEST;MESTIT1 | NM_177524;NM_002402;NM_177525;NR_004382 | 130131804 | 130131854 |
| MEST;MESTIT1 | NM_177524;NM_002402;NM_177525;NR_004382 | 130131844 | 130131894 |
| MEST;MESTIT1 | NM_177524;NM_002402;NM_177525;NR_004382 | 130131860 | 130131910 |
| MEST;MESTIT1 | NM_177524;NM_002402;NM_177525;NR_004382 | 130131862 | 130131912 |
| MEST;MESTIT1 | NM_177524;NM_002402;NM_177525;NR_004382 | 130131880 | 130131930 |
| MEST;MESTIT1 | NM_177524;NM_002402;NM_177525;NR_004382 | 130131891 | 130131941 |
| MEST;MESTIT1 | NM_177524;NM_002402;NM_177525;NR_004382 | 130131896 | 130131946 |
| MEST;MESTIT1 | NM_177524;NM_002402;NM_177525;NR_004382 | 130131898 | 130131948 |
| MEST;MESTIT1 | NM_177524;NM_002402;NM_177525;NR_004382 | 130131906 | 130131956 |
| MEST;MESTIT1 | NM_177524;NM_002402;NM_177525;NR_004382 | 130132136 | 130132186 |
| MEST;MESTIT1 | NM_177524;NM_177525;NR_004382;NM_002402 | 130132174 | 130132224 |
| MEST;MESTIT1 | NM_177524;NM_177525;NR_004382;NM_002402 | 130132234 | 130132284 |
| MEST;MESTIT1 | NM_177524;NM_177525;NR_004382;NM_002402 | 130132240 | 130132290 |
| MEST;MESTIT1 | NM_177524;NM_177525;NR_004382;NM_002402 | 130132261 | 130132311 |
| MEST;MESTIT1 | NM_177524;NM_177525;NR_004382;NM_002402 | 130132273 | 130132323 |
| MEST;MESTIT1 | NM_177524;NM_177525;NR_004382;NM_002402 | 130132280 | 130132330 |
| MEST;MESTIT1 | NM_177524;NM_177525;NR_004382;NM_002402 | 130132294 | 130132344 |
| MEST;MESTIT1 | NM_177524;NM_177525;NR_004382;NM_002402 | 130132335 | 130132385 |
| MEST;MESTIT1 | NM_177524;NM_177525;NR_004382;NM_002402 | 130132388 | 130132438 |
| MEST;MESTIT1 | NM_177524;NM_177525;NR_004382;NM_002402 | 130132394 | 130132444 |
| MEST;MESTIT1 | NM_177524;NM_177525;NR_004382;NM_002402 | 130132397 | 130132447 |
| MEST;MESTIT1 | NM_177524;NM_177525;NR_004382;NM_002402 | 130132428 | 130132478 |
| MEST         | NM_177524;NM_177525;NM_002402           | 130132702 | 130132752 |
| MEST         | NM_177524;NM_177525;NM_002402           | 130132765 | 130132815 |
| MEST         | NM_177524;NM_177525;NM_002402           | 130133085 | 130133135 |
| AGBL3        | NM_178563                               | 134671541 | 134671591 |
| SVOPL        | NM_001139456;NM_174959                  | 138348749 | 138348799 |
| SVOPL        | NM_001139456;NM_174959                  | 138348956 | 138349006 |
| SVOPL        | NM_001139456;NM_174959                  | 138349133 | 138349183 |
| SVOPL        | NM_001139456;NM_174959                  | 138349418 | 138349468 |
| ATP6V0A4     | NM_130840;NM_020632;NM_130841           | 138413396 | 138413446 |
| SLC37A3      | NM_032295;NM_207113                     | 140098554 | 140098604 |
| BRAF         | NM_004333                               | 140624445 | 140624495 |
| TAS2R38      | NM_176817                               | 141674814 | 141674864 |
|              |                                         | 141950998 | 141951048 |

|                  |                                         |           |           |
|------------------|-----------------------------------------|-----------|-----------|
| EPHA1            | NM_005232                               | 143088447 | 143088497 |
| TPK1             | NM_022445;NM_001042482                  | 144273812 | 144273862 |
| ZNF282           | NM_003575                               | 148892427 | 148892477 |
| ZNF767           | NR_027789;NR_027788                     | 149322748 | 149322798 |
| REPIN1           | NM_001099696;NM_013400;NM_001099695     | 150065214 | 150065264 |
| CDK5;SLC4A2      | NM_004935;NM_001164410;NM_003040        | 150756383 | 150756433 |
| AGAP3            | NM_031946                               | 150828536 | 150828586 |
| CHPF2            | NM_019015                               | 150929656 | 150929706 |
| WDR86            | NM_198285                               | 151107260 | 151107310 |
| PRKAG2           | NM_001040633;NM_016203                  | 151489075 | 151489125 |
|                  |                                         | 152600791 | 152600841 |
| DPP6             | NM_001936;NM_130797;NM_001039350        | 154068711 | 154068761 |
| PAXIP1;LOC202781 | NM_007349;NR_028090                     | 154794618 | 154794668 |
| HTR5A            | NM_024012                               | 154862745 | 154862795 |
| HTR5A            | NM_024012                               | 154862944 | 154862994 |
| HTR5A            | NM_024012                               | 154863151 | 154863201 |
| HTR5A            | NM_024012                               | 154863219 | 154863269 |
| HTR5A            | NM_024012                               | 154863313 | 154863363 |
| HTR5A            | NM_024012                               | 154863356 | 154863406 |
|                  |                                         | 155674706 | 155674756 |
|                  |                                         | 155679126 | 155679176 |
|                  |                                         | 155679315 | 155679365 |
|                  |                                         | 155895583 | 155895633 |
|                  |                                         | 156263802 | 156263852 |
|                  |                                         | 156336650 | 156336700 |
| PTPRN2           | NM_002847;NM_130842;NM_130843           | 157362037 | 157362087 |
| PTPRN2           | NM_002847;NM_130842;NM_130843           | 157387131 | 157387181 |
| PTPRN2           | NM_002847;NM_130842;NM_130843           | 157446067 | 157446117 |
| PTPRN2           | NM_002847;NM_130842;NM_130843           | 157467858 | 157467908 |
| PTPRN2           | NM_002847;NM_130842;NM_130843           | 157468296 | 157468346 |
| PTPRN2           | NM_002847;NM_130842;NM_130843           | 157514259 | 157514309 |
| PTPRN2           | NM_002847;NM_130842;NM_130843           | 157546769 | 157546819 |
| PTPRN2           | NM_002847;NM_130842;NM_130843           | 157694491 | 157694541 |
| PTPRN2           | NM_002847;NM_130842;NM_130843           | 157744291 | 157744341 |
| PTPRN2           | NM_002847;NM_130842;NM_130843           | 157811818 | 157811868 |
| PTPRN2           | NM_002847;NM_130842;NM_130843           | 157956887 | 157956937 |
| PTPRN2           | NM_002847;NM_130842;NM_130843           | 158034756 | 158034806 |
| PTPRN2           | NM_002847;NM_130842;NM_130843           | 158058727 | 158058777 |
| PTPRN2           | NM_002847;NM_130842;NM_130843           | 158216832 | 158216882 |
| PTPRN2           | NM_002847;NM_130842;NM_130843           | 158319179 | 158319229 |
| PTPRN2;MIR595    | NM_002847;NM_130842;NR_030325;NM_130843 | 158325561 | 158325611 |
| PTPRN2           | NM_002847;NM_130842;NM_130843           | 158336793 | 158336843 |
| PTPRN2           | NM_002847;NM_130842;NM_130843           | 158349416 | 158349466 |
|                  |                                         | 158751566 | 158751616 |
| LOC154822        | NR_024394                               | 158800107 | 158800157 |

**Supplementary Table 2.** Maternally hypomethylated CpGs that passed filters one and two. Start and end coordinates are  $\pm 25$ bp from Illumina MAPINFO.

| UCSC RefGene Name | UCSC RefGene Accession                                                     | START bp | END bp  |
|-------------------|----------------------------------------------------------------------------|----------|---------|
|                   |                                                                            | 148249   | 148299  |
| FAM20C            | NM_020223                                                                  | 211907   | 211957  |
| FAM20C            | NM_020223                                                                  | 227639   | 227689  |
|                   |                                                                            | 580678   | 580728  |
| PRKAR1B           | NM_001164759;NM_001164762;NM_001164758;NM_001164760;NM_001164761;NM_002735 | 608950   | 609000  |
| PRKAR1B           | NM_001164759;NM_001164762;NM_001164758;NM_001164760;NM_001164761;NM_002735 | 624470   | 624520  |
| PRKAR1B           | NM_001164759;NM_001164762;NM_001164758;NM_001164760;NM_001164761;NM_002735 | 640578   | 640628  |
| PRKAR1B           | NM_001164759;NM_001164762;NM_001164758;NM_001164760;NM_001164761;NM_002735 | 679988   | 680038  |
| PRKAR1B           | NM_001164759;NM_001164762;NM_001164758;NM_001164760;NM_001164761;NM_002735 | 736920   | 736970  |
| HEATR2            | NM_017802                                                                  | 774608   | 774658  |
| HEATR2            | NM_017802                                                                  | 785004   | 785054  |
| HEATR2            | NM_017802                                                                  | 818284   | 818334  |
| UNC84A            | NM_025154;NM_001130965                                                     | 855340   | 855390  |
| UNC84A            | NM_025154;NM_001130965                                                     | 891019   | 891069  |
| UNC84A            | NM_025154;NM_001130965                                                     | 899450   | 899500  |
| C7orf20           | NM_015949                                                                  | 921131   | 921181  |
|                   |                                                                            | 936056   | 936106  |
| ADAP1             | NM_006869                                                                  | 960503   | 960553  |
| ADAP1             | NM_006869                                                                  | 963446   | 963496  |
| ADAP1             | NM_006869                                                                  | 989203   | 989253  |
| C7orf50;MIR339    | NM_001134395;NR_029898;NM_032350;NM_001134396                              | 1062656  | 1062706 |
| C7orf50           | NM_001134395;NM_032350;NM_001134396                                        | 1142618  | 1142668 |
|                   |                                                                            | 1215846  | 1215896 |
| UNCX              | NM_001080461                                                               | 1271900  | 1271950 |
|                   |                                                                            | 1287134  | 1287184 |
|                   |                                                                            | 1367702  | 1367752 |
| MICALL2           | NM_182924                                                                  | 1479927  | 1479977 |
| MICALL2           | NM_182924                                                                  | 1491762  | 1491812 |
| INTS1             | NM_001080453                                                               | 1533477  | 1533527 |
| INTS1             | NM_001080453                                                               | 1542193  | 1542243 |
| INTS1             | NM_001080453                                                               | 1545360  | 1545410 |
|                   |                                                                            | 1606241  | 1606291 |
|                   |                                                                            | 1718516  | 1718566 |
|                   |                                                                            | 1740287  | 1740337 |
| ELFN1             | NM_001128636                                                               | 1784562  | 1784612 |
|                   |                                                                            | 1847542  | 1847592 |
| MAD1L1            | NM_003550;NM_001013837;NM_001013836                                        | 1858891  | 1858941 |
| MAD1L1            | NM_003550;NM_001013837;NM_001013836                                        | 1883226  | 1883276 |
| MAD1L1            | NM_003550;NM_001013837;NM_001013836                                        | 1883365  | 1883415 |
| MAD1L1            | NM_003550;NM_001013837;NM_001013836                                        | 1883395  | 1883445 |
| MAD1L1            | NM_003550;NM_001013837;NM_001013836                                        | 1883735  | 1883785 |
| MAD1L1            | NM_003550;NM_001013837;NM_001013836                                        | 1883851  | 1883901 |
| MAD1L1            | NM_003550;NM_001013837;NM_001013836                                        | 1886252  | 1886302 |
| MAD1L1            | NM_003550;NM_001013837;NM_001013836                                        | 1943679  | 1943729 |
| MAD1L1            | NM_003550;NM_001013837;NM_001013836                                        | 1976939  | 1976989 |
| MAD1L1            | NM_003550;NM_001013837;NM_001013836                                        | 1980454  | 1980504 |
| MAD1L1            | NM_003550;NM_001013837;NM_001013836                                        | 2017461  | 2017511 |
| MAD1L1            | NM_003550;NM_001013837;NM_001013836                                        | 2029160  | 2029210 |

|          |                                                            |         |         |
|----------|------------------------------------------------------------|---------|---------|
| MAD1L1   | NM_003550;NM_001013837;NM_001013836                        | 2036135 | 2036185 |
| MAD1L1   | NM_003550;NM_001013837;NM_001013836                        | 2056525 | 2056575 |
| MAD1L1   | NM_003550;NM_001013837;NM_001013836                        | 2082825 | 2082875 |
| MAD1L1   | NM_003550;NM_001013837;NM_001013836                        | 2115522 | 2115572 |
| MAD1L1   | NM_003550;NM_001013837;NM_001013836                        | 2121130 | 2121180 |
| MAD1L1   | NM_003550;NM_001013837;NM_001013836                        | 2138788 | 2138838 |
| MAD1L1   | NM_003550;NM_001013837;NM_001013836                        | 2143482 | 2143532 |
| MAD1L1   | NM_003550;NM_001013837;NM_001013836                        | 2149789 | 2149839 |
| MAD1L1   | NM_003550;NM_001013837;NM_001013836                        | 2155057 | 2155107 |
| MAD1L1   | NM_003550;NM_001013837;NM_001013836                        | 2205702 | 2205752 |
| MAD1L1   | NM_003550;NM_001013837;NM_001013836                        | 2236145 | 2236195 |
| MAD1L1   | NM_003550;NM_001013837;NM_001013836                        | 2252748 | 2252798 |
| MAD1L1   | NM_001013837;NM_001013836;NM_003550                        | 2271789 | 2271839 |
|          |                                                            | 2293252 | 2293302 |
| IQCE     | NM_001100390;NM_152558                                     | 2606771 | 2606821 |
| IQCE     | NM_001100390;NM_152558                                     | 2643233 | 2643283 |
|          |                                                            | 2757317 | 2757367 |
|          |                                                            | 2764894 | 2764944 |
| GNA12    | NM_007353                                                  | 2842568 | 2842618 |
| CARD11   | NM_032415                                                  | 3019134 | 3019184 |
| CARD11   | NM_032415                                                  | 3019235 | 3019285 |
| CARD11   | NM_032415                                                  | 3019289 | 3019339 |
| CARD11   | NM_032415                                                  | 3019357 | 3019407 |
| CARD11   | NM_032415                                                  | 3033773 | 3033823 |
| SDK1     | NM_152744                                                  | 3996898 | 3996948 |
| SDK1     | NR_027816;NM_152744                                        | 4299621 | 4299671 |
|          |                                                            | 4389104 | 4389154 |
|          |                                                            | 4573691 | 4573741 |
| FOXK1    | NM_001037165                                               | 4722753 | 4722803 |
| FOXK1    | NM_001037165                                               | 4743321 | 4743371 |
| FOXK1    | NM_001037165                                               | 4747141 | 4747191 |
| FOXK1    | NM_001037165                                               | 4764418 | 4764468 |
| FOXK1    | NM_001037165                                               | 4764916 | 4764966 |
| FOXK1    | NM_001037165                                               | 4768115 | 4768165 |
| FOXK1    | NM_001037165                                               | 4775222 | 4775272 |
| FOXK1    | NM_001037165                                               | 4802994 | 4803044 |
| FOXK1    | NM_001037165                                               | 4807479 | 4807529 |
| KIAA0415 | NM_014855                                                  | 4815126 | 4815176 |
| RADIL    | NM_018059                                                  | 4847015 | 4847065 |
| RADIL    | NM_018059                                                  | 4876032 | 4876082 |
| RADIL    | NM_018059                                                  | 4911096 | 4911146 |
| RADIL    | NM_018059                                                  | 4923590 | 4923640 |
| MMD2     | NM_001100600;NM_198403                                     | 4998390 | 4998440 |
| RNF216L  | NR_023385;NR_023384;NR_015449                              | 5013443 | 5013493 |
| WIPI2    | NM_016003;NM_001033519;NM_015610;NM_001033520;NM_001033518 | 5257584 | 5257634 |
| WIPI2    | NM_016003;NM_001033519;NM_015610;NM_001033520;NM_001033518 | 5270542 | 5270592 |
| SLC29A4  | NM_001040661;NM_153247                                     | 5321651 | 5321701 |
| TNRC18   | NM_001080495                                               | 5401584 | 5401634 |
| TNRC18   | NM_001080495                                               | 5429011 | 5429061 |
| TNRC18   | NM_001080495                                               | 5464569 | 5464619 |
| FBXL18   | NM_024963                                                  | 5530921 | 5530971 |
| FBXL18   | NM_024963                                                  | 5537987 | 5538037 |
| FSCN1    | NM_003088                                                  | 5632226 | 5632276 |
| ZNF815   | NR_023382                                                  | 5862424 | 5862474 |
| ZNF815   | NR_023382                                                  | 5888052 | 5888102 |
| USP42    | NM_032172                                                  | 6193949 | 6193999 |

|         |                                                               |          |          |
|---------|---------------------------------------------------------------|----------|----------|
| USP42   | NM_032172                                                     | 6197653  | 6197703  |
| USP42   | NM_032172                                                     | 6197865  | 6197915  |
| CYTH3   | NM_004227                                                     | 6311387  | 6311437  |
| C7orf70 | NM_001037163                                                  | 6370291  | 6370341  |
| GRID2IP | NM_001145118                                                  | 6539525  | 6539575  |
| ZDHHC4  | NM_001134387;NM_001134389;NM_001134388;NM_018106              | 6616053  | 6616103  |
| ZDHHC4  | NM_001134388;NM_001134389;NM_001134387;NM_001134387;NM_018106 | 6617239  | 6617289  |
| ZNF853  | NM_017560;NM_017560                                           | 6655702  | 6655752  |
|         |                                                               | 6695067  | 6695117  |
|         |                                                               | 6704020  | 6704070  |
|         |                                                               | 6885514  | 6885564  |
|         |                                                               | 6897592  | 6897642  |
|         |                                                               | 6915483  | 6915533  |
|         |                                                               | 7032149  | 7032199  |
|         |                                                               | 7111801  | 7111851  |
|         |                                                               | 7188983  | 7189033  |
| C1GALT1 | NM_020156                                                     | 7224844  | 7224894  |
| RPA3    | NM_002947                                                     | 7676586  | 7676636  |
| NXPH1   | NM_152745                                                     | 8475173  | 8475223  |
| NXPH1   | NM_152745                                                     | 8481969  | 8482019  |
| NXPH1   | NM_152745                                                     | 8483544  | 8483594  |
| ETV1    | NM_001163148;NM_004956;NM_001163149;NM_001163147              | 14028665 | 14028715 |
|         |                                                               | 16626199 | 16626249 |
|         |                                                               | 16626301 | 16626351 |
|         |                                                               | 16626505 | 16626555 |
| AGR3    | NM_176813                                                     | 16913820 | 16913870 |
|         |                                                               | 16956525 | 16956575 |
| TWIST1  | NM_000474                                                     | 19157271 | 19157321 |
|         |                                                               | 19158929 | 19158979 |
| TMEM196 | NM_152774                                                     | 19812454 | 19812504 |
| SP8     | NM_198956;NM_182700                                           | 20823956 | 20824006 |
| SP8     | NM_182700;NM_198956                                           | 20827800 | 20827850 |
|         |                                                               | 20830080 | 20830130 |
|         |                                                               | 20830632 | 20830682 |
|         |                                                               | 20834386 | 20834436 |
|         |                                                               | 20838498 | 20838548 |
| DNAH11  | NM_003777                                                     | 21583201 | 21583251 |
| CDCA7L  | NM_001127371;NM_001127370;NM_018719                           | 21946000 | 21946050 |
| CDCA7L  | NM_001127371;NM_018719;NM_001127370                           | 21980205 | 21980255 |
| IL6     | NM_000600                                                     | 22766804 | 22766854 |
| TOMM7   | NM_019059                                                     | 22863297 | 22863347 |
| SNORD93 | NR_003075                                                     | 22894770 | 22894820 |
| FAM126A | NM_032581                                                     | 23051336 | 23051386 |
| KLHL7   | NM_001031710;NM_018846                                        | 23146192 | 23146242 |
| GPNMB   | NM_001005340;NM_002510                                        | 23285072 | 23285122 |
| C7orf30 | NM_138446                                                     | 23338773 | 23338823 |
| IGF2BP3 | NM_006547                                                     | 23385659 | 23385709 |
| CLK2P   | NR_002711                                                     | 23626037 | 23626087 |
|         |                                                               | 23695241 | 23695291 |
| NPY     | NM_000905                                                     | 24323534 | 24323584 |
| NPY     | NM_000905                                                     | 24330655 | 24330705 |
| DFNA5   | NM_001127454;NM_004403;NM_001127453                           | 24796330 | 24796380 |
| OSBPL3  | NM_015550;NM_145321;NM_145320;NM_145322                       | 24874272 | 24874322 |
| CYCS    | NM_018947                                                     | 25164949 | 25164999 |
|         |                                                               | 25169055 | 25169105 |



|                |                                         |          |          |
|----------------|-----------------------------------------|----------|----------|
|                |                                         | 25702684 | 25702734 |
|                |                                         | 25893980 | 25894030 |
|                |                                         | 25897882 | 25897932 |
|                |                                         | 25898421 | 25898471 |
|                |                                         | 25900743 | 25900793 |
| NFE2L3         | NM_004289                               | 26199847 | 26199897 |
| NFE2L3         | NM_004289                               | 26226364 | 26226414 |
| CBX3;HNRNPA2B1 | NM_016587;NM_031243;NM_007276;NM_002137 | 26240876 | 26240926 |
|                |                                         | 27138687 | 27138737 |
|                |                                         | 27138949 | 27138999 |
| HOXA2          | NM_006735                               | 27143453 | 27143503 |
|                |                                         | 27144570 | 27144620 |
| HOXA3          | NM_153631;NM_153632;NM_030661           | 27154695 | 27154745 |
| HOXA3          | NM_153631;NM_030661                     | 27159858 | 27159908 |
| HOXA4          | NM_002141                               | 27169649 | 27169699 |
| HOXA4          | NM_002141                               | 27169715 | 27169765 |
| HOXA4          | NM_002141                               | 27169932 | 27169982 |
| HOXA4          | NM_002141                               | 27170216 | 27170266 |
| HOXA4          | NM_002141                               | 27170288 | 27170338 |
| HOXA4          | NM_002141                               | 27170363 | 27170413 |
| HOXA4          | NM_002141                               | 27170369 | 27170419 |
| HOXA4          | NM_002141                               | 27170387 | 27170437 |
| HOXA4          | NM_002141                               | 27170529 | 27170579 |
| HOXA4          | NM_002141                               | 27170692 | 27170742 |
| HOXA4          | NM_002141                               | 27170730 | 27170780 |
| HOXA4          | NM_002141                               | 27170794 | 27170844 |
| HOXA4          | NM_002141                               | 27170807 | 27170857 |
| HOXA4          | NM_002141                               | 27170855 | 27170905 |
| HOXA4          | NM_002141                               | 27170867 | 27170917 |
| HOXA4          | NM_002141                               | 27170936 | 27170986 |
| HOXA4          | NM_002141                               | 27170969 | 27171019 |
| HOXA4          | NM_002141                               | 27171026 | 27171076 |
| HOXA4          | NM_002141                               | 27171129 | 27171179 |
|                |                                         | 27178836 | 27178886 |
| HOXA9          | NM_152739                               | 27204324 | 27204374 |
| HOXA13         | NM_000522                               | 27238885 | 27238935 |
|                |                                         | 27265497 | 27265547 |
|                |                                         | 27275600 | 27275650 |
|                |                                         | 27289170 | 27289220 |
|                |                                         | 27292120 | 27292170 |
| JAZF1          | NM_175061                               | 27946446 | 27946496 |
| TRIL           | NM_014817                               | 28997378 | 28997428 |
| TRIL           | NM_014817                               | 28998170 | 28998220 |
| CHN2           | NM_004067                               | 29330727 | 29330777 |
| PRR15          | NM_175887                               | 29604476 | 29604526 |
| PRR15          | NM_175887                               | 29605599 | 29605649 |
| PRR15          | NM_175887                               | 29605783 | 29605833 |
| PRR15          | NM_175887                               | 29605872 | 29605922 |
| PRR15          | NM_175887                               | 29606057 | 29606107 |
| PRR15          | NM_175887                               | 29606264 | 29606314 |
| PRR15          | NM_175887                               | 29606324 | 29606374 |
|                |                                         | 31061376 | 31061426 |
|                |                                         | 31373471 | 31373521 |
|                |                                         | 31376463 | 31376513 |
|                |                                         | 31425657 | 31425707 |
| C7orf16        | NM_006658;NM_001145123                  | 31726629 | 31726679 |
| C7orf16        | NM_006658;NM_001145123                  | 31726679 | 31726729 |
| PDE1C          | NM_005020                               | 32110120 | 32110170 |

|               |                                                                                 |          |          |
|---------------|---------------------------------------------------------------------------------|----------|----------|
| LOC441208     | NR_003502                                                                       | 32767530 | 32767580 |
|               |                                                                                 | 33761759 | 33761809 |
|               |                                                                                 | 33802570 | 33802620 |
| TBX20         | NM_001077653;NM_001166220                                                       | 35294633 | 35294683 |
|               |                                                                                 | 35295563 | 35295613 |
|               |                                                                                 | 35296453 | 35296503 |
|               |                                                                                 | 35494320 | 35494370 |
|               |                                                                                 | 36101754 | 36101804 |
| EEPD1         | NM_030636                                                                       | 36193319 | 36193369 |
| EEPD1         | NM_030636                                                                       | 36230031 | 36230081 |
| ANLN          | NM_018685                                                                       | 36453622 | 36453672 |
| AOAH          | NM_001637                                                                       | 36585395 | 36585445 |
| AOAH          | NM_001637                                                                       | 36700719 | 36700769 |
| AOAH          | NM_001637                                                                       | 36700914 | 36700964 |
|               |                                                                                 | 37531716 | 37531766 |
|               |                                                                                 | 37533569 | 37533619 |
| POU6F2        | NM_001166018;NM_007252                                                          | 39017430 | 39017480 |
| POU6F2        | NM_007252;NM_001166018                                                          | 39171088 | 39171138 |
| POU6F2        | NM_007252;NM_001166018                                                          | 39326887 | 39326937 |
| C7orf36       | NM_020192                                                                       | 39605765 | 39605815 |
| RALA          | NM_005402                                                                       | 39662442 | 39662492 |
| RALA          | NM_005402                                                                       | 39662739 | 39662789 |
| LOC349114     | NR_026999                                                                       | 39832713 | 39832763 |
| GLI3          | NM_000168                                                                       | 42006095 | 42006145 |
| GLI3          | NM_000168                                                                       | 42267312 | 42267362 |
| GLI3          | NM_000168                                                                       | 42275845 | 42275895 |
| GLI3          | NM_000168                                                                       | 42277925 | 42277975 |
| GLI3          | NM_000168                                                                       | 42278042 | 42278092 |
| GLI3          | NM_000168                                                                       | 42278052 | 42278102 |
| GLI3          | NM_000168                                                                       | 42278064 | 42278114 |
| GLI3          | NM_000168                                                                       | 42278071 | 42278121 |
|               |                                                                                 | 42725409 | 42725459 |
| MRPL32;PSMA2  | NM_031903;NM_002787                                                             | 42972063 | 42972113 |
|               |                                                                                 | 43116356 | 43116406 |
| HECW1         | NM_015052                                                                       | 43151803 | 43151853 |
| PGAM2         | NM_000290                                                                       | 44104910 | 44104960 |
| POLD2         | NM_006230;NM_001127218                                                          | 44161458 | 44161508 |
| CAMK2B        | NM_172081;NM_172082;NM_172083;NM_172084;NM_172079;NM_001220;NM_172078;NM_172080 | 44349276 | 44349326 |
| NPC1L1        | NM_001101648;NM_013389                                                          | 44582219 | 44582269 |
| PURB          | NM_033224                                                                       | 44923694 | 44923744 |
| MYO1G         | NM_033054                                                                       | 45006446 | 45006496 |
| TBRG4;SNORA5A | NM_030900;NR_002919;NM_004749;NM_199122                                         | 45144146 | 45144196 |
| RAMP3         | NM_005856                                                                       | 45197304 | 45197354 |
| ADCY1         | NM_021116                                                                       | 45613700 | 45613750 |
| IGFBP1        | NM_000596                                                                       | 45927915 | 45927965 |
| IGFBP3        | NM_000598;NM_001013398                                                          | 45959642 | 45959692 |
|               |                                                                                 | 46213018 | 46213068 |
|               |                                                                                 | 47092814 | 47092864 |
|               |                                                                                 | 47219743 | 47219793 |
|               |                                                                                 | 47294253 | 47294303 |
| C7orf65       | NM_001123065                                                                    | 47700166 | 47700216 |
| UPP1          | NM_181597;NM_003364                                                             | 48129789 | 48129839 |
| IKZF1         | NM_006060                                                                       | 50343106 | 50343156 |
| IKZF1         | NM_006060                                                                       | 50345024 | 50345074 |
| DDC           | NM_001082971;NM_000790                                                          | 50612028 | 50612078 |
| DDC           | NM_000790;NM_001082971                                                          | 50628816 | 50628866 |
|               |                                                                                 | 50879979 | 50880029 |

|                 |                                         |          |          |
|-----------------|-----------------------------------------|----------|----------|
|                 |                                         | 51539489 | 51539539 |
|                 |                                         | 51539558 | 51539608 |
|                 |                                         | 51920311 | 51920361 |
| VSTM2A          | NM_182546                               | 54614185 | 54614235 |
|                 |                                         | 55073407 | 55073457 |
| EGFR            | NM_005228;NM_201284;NM_201283;NM_201282 | 55086121 | 55086171 |
| EGFR            | NM_201284;NM_201282;NM_005228           | 55224870 | 55224920 |
| EGFR            | NM_005228                               | 55260888 | 55260938 |
|                 |                                         | 55412526 | 55412576 |
|                 |                                         | 55412970 | 55413020 |
|                 |                                         | 55413197 | 55413247 |
|                 |                                         | 55516847 | 55516897 |
| VOPPI           | NM_030796                               | 55553520 | 55553570 |
| LOC442308       | NR_003598                               | 55714388 | 55714438 |
|                 |                                         | 57486679 | 57486729 |
| ZNF716          | NM_001159279                            | 57510107 | 57510157 |
|                 |                                         | 63206569 | 63206619 |
|                 |                                         | 63225751 | 63225801 |
|                 |                                         | 63358529 | 63358579 |
|                 |                                         | 63648810 | 63648860 |
| ZNF680          | NM_001130022;NM_178558;NM_001130022     | 64023409 | 64023459 |
| ZNF117          | NM_015852                               | 64452515 | 64452565 |
|                 |                                         | 64734068 | 64734118 |
| SNORA22;CCT6P1  | NR_002961;NR_003110                     | 65219929 | 65219979 |
| GUSB            | NM_000181                               | 65439407 | 65439457 |
| RABGEF1         | NM_014504                               | 66205457 | 66205507 |
|                 |                                         | 67711206 | 67711256 |
| AUTS2           | NM_015570;NM_001127231                  | 70252546 | 70252596 |
| AUTS2           | NM_015570;NM_001127231                  | 70255779 | 70255829 |
| CALN1           | NM_031468                               | 71877088 | 71877138 |
| FKBP6           | NM_001135211;NM_003602                  | 72756517 | 72756567 |
| FZD9            | NM_003508                               | 72847837 | 72847887 |
| BAZ1B           | NM_032408                               | 72920459 | 72920509 |
| VPS37D          | NM_001077621                            | 73081746 | 73081796 |
| VPS37D          | NM_001077621                            | 73082315 | 73082365 |
|                 |                                         | 73093770 | 73093820 |
| DNAJC30         | NM_032317                               | 73095421 | 73095471 |
| DNAJC30;WBSCR22 | NM_032317;NM_017528                     | 73097898 | 73097948 |
| WBSCR22         | NM_017528                               | 73112201 | 73112251 |
| STX1A           | NM_001165903;NM_004603                  | 73118723 | 73118773 |
| LIMK1           | NM_002314                               | 73535259 | 73535309 |
|                 |                                         | 73672910 | 73672960 |
| GTF2IRD1        | NM_016328;NM_005685                     | 73867896 | 73867946 |
| GTF2IRD1        | NM_016328;NM_005685                     | 73870184 | 73870234 |
| GTF2IRD1        | NM_005685;NM_016328                     | 73938913 | 73938963 |
|                 |                                         | 75951032 | 75951082 |
| UPK3B           | NM_182684;NM_030570                     | 76145607 | 76145657 |
| UPK3B           | NM_182684;NM_030570                     | 76145647 | 76145697 |
|                 |                                         | 76683184 | 76683234 |
| PHTF2; TMEM60   | NM_001127360;NM_001127358;NM_032936     | 77428309 | 77428359 |
| MAGI2           | NM_012301                               | 77646904 | 77646954 |
| MAGI2           | NM_012301                               | 78376374 | 78376424 |
| MAGI2           | NM_012301                               | 78948039 | 78948089 |
| SEMA3C          | NM_006379                               | 80547999 | 80548049 |
|                 |                                         | 81481479 | 81481529 |
| SEMA3A          | NM_006080                               | 83825083 | 83825133 |
|                 |                                         | 85911515 | 85911565 |
| KIAA1324L       | NM_001142749                            | 86686436 | 86686486 |

|                  |                                                            |          |          |
|------------------|------------------------------------------------------------|----------|----------|
| C7orf23          | NM_024315                                                  | 86850473 | 86850523 |
| ABCB1            | NM_000927                                                  | 87181441 | 87181491 |
| RUNDC3B; ABCB1   | NM_138290;NM_001134406;NM_001134405;NM_000927              | 87257761 | 87257811 |
| ZNF804B;MGC26647 | NM_181646;NM_152706                                        | 88425114 | 88425164 |
| STEAP2           | NM_152999;NM_001040665                                     | 89840874 | 89840924 |
| CLDN12           | NM_012129                                                  | 90043188 | 90043238 |
|                  |                                                            | 90225753 | 90225803 |
|                  |                                                            | 90226584 | 90226634 |
|                  |                                                            | 90272335 | 90272385 |
|                  |                                                            | 90307496 | 90307546 |
| CDK14            | NM_012395                                                  | 90764792 | 90764842 |
| CDK14            | NM_012395                                                  | 90799222 | 90799272 |
| AKAP9            | NM_147185;NM_005751                                        | 91570080 | 91570130 |
| MGC16142         | NR_026902                                                  | 92167585 | 92167635 |
| CALCR            | NM_001164737;NM_001742                                     | 93205212 | 93205262 |
| TFPI2            | NM_006528                                                  | 93520321 | 93520371 |
| SGCE;PEG10       | NM_001099400;NM_001099401;NM_001040152;NM_003919;NM_015068 | 94284386 | 94284436 |
| SGCE;PEG10       | NM_001099400;NM_001099401;NM_001040152;NM_003919;NM_015068 | 94284495 | 94284545 |
| SGCE;PEG10       | NM_001099400;NM_001099401;NM_001040152;NM_003919;NM_015068 | 94284501 | 94284551 |
| SGCE;PEG10       | NM_001099400;NM_001099401;NM_001040152;NM_003919;NM_015068 | 94284598 | 94284648 |
| SGCE;PEG10;      | NM_001099400;NM_001099401;NM_001040152;NM_003919;NM_015068 | 94284653 | 94284703 |
| PEG10            | NM_001040152;NM_015068                                     | 94293225 | 94293275 |
| PON1             | NM_000446                                                  | 94953628 | 94953678 |
| PON1             | NM_000446                                                  | 94953655 | 94953705 |
| PON1             | NM_000446                                                  | 94953745 | 94953795 |
| PON1             | NM_000446                                                  | 94953785 | 94953835 |
| PON1             | NM_000446                                                  | 94953852 | 94953902 |
| PON1             | NM_000446                                                  | 94953931 | 94953981 |
| PON1             | NM_000446                                                  | 94954034 | 94954084 |
| PON1             | NM_000446                                                  | 94954119 | 94954169 |
| PON1             | NM_000446                                                  | 94954177 | 94954227 |
| PON2             | NM_000305;NM_001018161                                     | 95034226 | 95034276 |
| ASB4             | NM_016116;NM_145872                                        | 95156935 | 95156985 |
| ASB4             | NM_016116;NM_145872                                        | 95157254 | 95157304 |
| SLC25A13         | NM_014251;NM_001160210;NR_027662                           | 95805892 | 95805942 |
| MIR591;SLC25A13  | NR_030322;NM_014251;NM_001160210;NR_027662                 | 95849167 | 95849217 |
| DLX6AS           | NR_015448                                                  | 96622583 | 96622633 |
| DLX6AS           | NR_015448                                                  | 96626126 | 96626176 |
| DLX6AS           | NR_015448                                                  | 96632269 | 96632319 |
| DLX6AS           | NR_015448                                                  | 96642485 | 96642535 |
|                  |                                                            | 96648018 | 96648068 |
| DLX5             | NM_005221                                                  | 96651086 | 96651136 |
| DLX5             | NM_005221                                                  | 96652869 | 96652919 |
|                  |                                                            | 96663702 | 96663752 |
| ACN9             | NM_020186                                                  | 96745315 | 96745365 |
| ACN9             | NM_020186                                                  | 96746903 | 96746953 |
|                  |                                                            | 97580488 | 97580538 |
|                  |                                                            | 97587035 | 97587085 |
| BHLHA15          | NM_177455                                                  | 97841973 | 97842023 |
| NPTX2            | NM_002523                                                  | 98245805 | 98245855 |
| NPTX2            | NM_002523                                                  | 98248827 | 98248877 |
| TMEM130          | NM_152913;NM_001134451;NM_001134450                        | 98468022 | 98468072 |

|              |                                                      |           |           |
|--------------|------------------------------------------------------|-----------|-----------|
| TRRAP        | NM_003496                                            | 98475590  | 98475640  |
| TRRAP        | NM_003496                                            | 98475876  | 98475926  |
| TRRAP        | NM_003496                                            | 98586523  | 98586573  |
| SMURF1       | NM_020429;NM_181349                                  | 98632029  | 98632079  |
| SMURF1       | NM_020429;NM_181349                                  | 98633085  | 98633135  |
| SMURF1       | NM_020429;NM_181349                                  | 98722445  | 98722495  |
| ARPC1A       | NM_006409                                            | 98923089  | 98923139  |
| CPSF4        | NM_001081559;NM_006693                               | 99051475  | 99051525  |
|              |                                                      | 99067137  | 99067187  |
| CYP3A7       | NM_000765                                            | 99330937  | 99330987  |
| ZKSCAN1      | NM_003439                                            | 99630954  | 99631004  |
| ZKSCAN1      | NM_003439                                            | 99630973  | 99631023  |
| TAF6;CNPY4   | NM_139123;NM_005641;NM_139315;NM_152755;NM_139122    | 99716960  | 99717010  |
| GATS;PVRIG   | NR_028040;NM_178831;NR_028038;NR_028039;NM_024070    | 99819085  | 99819135  |
| SAP25        | NM_001168682                                         | 100170471 | 100170521 |
| PCOLCE       | NM_002593                                            | 100199978 | 100200028 |
| PCOLCE       | NM_002593                                            | 100199984 | 100200034 |
| MOSPD3       | NM_023948;NM_001040098;NM_001040099;NM_001040097     | 100210072 | 100210122 |
| GIGYF1       | NM_022574                                            | 100287456 | 100287506 |
| EPO          | NM_000799                                            | 100318214 | 100318264 |
| SRRT         | NM_015908;NM_001128852;NM_001128853;NM_001128854     | 100480513 | 100480563 |
| SRRT         | NM_015908;NM_001128852;NM_001128853;NM_001128854     | 100480564 | 100480614 |
| ACHE         | NM_015831;NM_000665                                  | 100488997 | 100489047 |
|              |                                                      | 100610378 | 100610428 |
| MUC12        | NM_001164462                                         | 100611476 | 100611526 |
|              |                                                      | 100739870 | 100739920 |
| SERPINE1     | NM_001165413;NM_000602                               | 100774742 | 100774792 |
| C7orf52      | NM_198571                                            | 100823675 | 100823725 |
| C7orf52      | NM_198571                                            | 100823765 | 100823815 |
| ZNHIT1;PLOC3 | NM_006349;NM_001084                                  | 100862275 | 100862325 |
| FIS1         | NM_016068                                            | 100887214 | 100887264 |
|              |                                                      | 100921967 | 100922017 |
|              |                                                      | 100946086 | 100946136 |
|              |                                                      | 100946767 | 100946817 |
| EMID2        | NM_133457                                            | 101005807 | 101005857 |
| CUX1         | NM_181500;NM_181552;NM_001913                        | 101459929 | 101459979 |
| CUX1         | NM_181500;NM_181552;NM_001913                        | 101562323 | 101562373 |
| CUX1         | NM_181500;NM_181552;NM_001913                        | 101630625 | 101630675 |
| CUX1         | NM_181500;NM_181552;NM_001913                        | 101829245 | 101829295 |
| SH2B2        | NM_020979                                            | 101943763 | 101943813 |
| SH2B2        | NM_020979                                            | 101944250 | 101944300 |
| SH2B2        | NM_020979                                            | 101944405 | 101944455 |
| SH2B2        | NM_020979                                            | 101944531 | 101944581 |
| SH2B2        | NM_020979                                            | 101961771 | 101961821 |
| SH2B2        | NM_020979                                            | 101962087 | 101962137 |
| SH2B2        | NM_020979                                            | 101962098 | 101962148 |
| SLC26A5      | NM_206885;NM_198999;NM_206883;NM_001167962;NM_206884 | 103085953 | 103086003 |
| SRPK2        | NM_182691;NM_182692                                  | 104863601 | 104863651 |
| SRPK2        | NM_182691;NM_182692                                  | 104885083 | 104885133 |
| PUS7         | NM_019042                                            | 105114743 | 105114793 |
| PUS7         | NM_019042                                            | 105161958 | 105162008 |
| PUS7         | NM_019042                                            | 105162916 | 105162966 |

|                   |                                     |           |           |
|-------------------|-------------------------------------|-----------|-----------|
|                   |                                     | 105228982 | 105229032 |
| ATXN7L1           | NM_152749;NM_020725                 | 105460017 | 105460067 |
| LOC286002         | NR_028137                           | 107297690 | 107297740 |
| SLC26A4;LOC286002 | NM_000441;NR_028137                 | 107300914 | 107300964 |
| NRCAM             | NM_001037132;NM_005010              | 108093423 | 108093473 |
|                   |                                     | 113723000 | 113723050 |
| MET               | NM_001127500;NM_000245              | 116311800 | 116311850 |
| KCND2             | NM_012281                           | 119945469 | 119945519 |
| WNT16             | NM_057168;NM_016087                 | 120969019 | 120969069 |
|                   |                                     | 121939802 | 121939852 |
|                   |                                     | 121940319 | 121940369 |
|                   |                                     | 121940926 | 121940976 |
| FEZF1             | NM_001160264;NM_001024613           | 121943680 | 121943730 |
| FEZF1             | NM_001160264;NM_001024613           | 121944425 | 121944475 |
|                   |                                     | 121947400 | 121947450 |
| CADPS2            | NM_001009571;NM_001167940;NM_017954 | 122488305 | 122488355 |
| CADPS2            | NM_001009571;NM_017954;NM_001167940 | 122526801 | 122526851 |
|                   |                                     | 122553890 | 122553940 |
| NDUFA5            | NM_005000                           | 123197971 | 123198021 |
|                   |                                     | 123215296 | 123215346 |
| TMEM229A          | NM_001136002                        | 123673524 | 123673574 |
|                   |                                     | 124092399 | 124092449 |
| GRM8              | NM_001127323;NR_028041;NM_000845    | 126275055 | 126275105 |
| GRM8              | NM_001127323;NR_028041;NM_000845    | 126866898 | 126866948 |
| GRM8              | NM_000845;NR_028041;NM_001127323    | 126884976 | 126885026 |
| GRM8              | NM_001127323                        | 126891172 | 126891222 |
| SND1              | NM_014390                           | 127627226 | 127627276 |
| SND1              | NM_014390                           | 127672633 | 127672683 |
| SND1              | NM_014390                           | 127673013 | 127673063 |
|                   |                                     | 127749438 | 127749488 |
|                   |                                     | 127808823 | 127808873 |
| PRRT4             | NM_001114726                        | 128001410 | 128001460 |
| FLNC              | NM_001458;NM_001127487              | 128470391 | 128470441 |
| LOC286016;TNPO3   | NR_002187;NM_012470                 | 128696204 | 128696254 |
| TSPAN33           | NM_178562                           | 128784578 | 128784628 |
| AHCYL2            | NM_001130720;NM_015328              | 128905702 | 128905752 |
| CPA2              | NM_001869                           | 129912462 | 129912512 |
| KLF14             | NM_138693                           | 130418290 | 130418340 |
| KLF14             | NM_138693                           | 130419134 | 130419184 |
|                   |                                     | 130572440 | 130572490 |
|                   |                                     | 131440726 | 131440776 |
| PLXNA4            | NM_020911;NM_181775;NM_001105543    | 132260450 | 132260500 |
| EXOC4             | NM_021807;NM_001037126              | 133112434 | 133112484 |
| EXOC4             | NM_021807                           | 133451596 | 133451646 |
| LRGUK             | NM_144648                           | 133812047 | 133812097 |
| CALD1             | NM_033157;NM_004342;NM_033138       | 134513264 | 134513314 |
| STRA8             | NM_182489                           | 134916851 | 134916901 |
| SLC13A4           | NM_012450                           | 135412998 | 135413048 |
| SLC13A4           | NM_012450                           | 135413074 | 135413124 |
| MTPN;LUZP6        | NM_145808;NM_001128619              | 135662949 | 135662999 |
| DGKI              | NM_004717                           | 137531931 | 137531981 |
| CREB3L2           | NM_194071                           | 137605228 | 137605278 |
| CREB3L2           | NM_194071                           | 137683577 | 137683627 |
| TRIM24            | NM_003852;NM_015905                 | 138147013 | 138147063 |
| ATP6V0A4          | NM_130840;NM_020632;NM_130841       | 138413303 | 138413353 |
| KIAA1549          | NM_001164665;NM_020910              | 138603299 | 138603349 |
| KLRG2             | NM_198508                           | 139167522 | 139167572 |
| KLRG2             | NM_198508                           | 139168779 | 139168829 |



|                     |                                               |           |           |
|---------------------|-----------------------------------------------|-----------|-----------|
| PARP12              | NM_022750                                     | 139760350 | 139760400 |
| LOC100134229;JHDM1D | NR_024451;NM_030647                           | 139876495 | 139876545 |
| LOC100134229        | NR_024451                                     | 139878695 | 139878745 |
| RAB19               | NM_001008749                                  | 140103739 | 140103789 |
| RAB19               | NM_001008749                                  | 140114112 | 140114162 |
|                     |                                               | 140135586 | 140135636 |
|                     |                                               | 140148766 | 140148816 |
| ADCK2               | NM_052853                                     | 140372839 | 140372889 |
| ADCK2               | NM_052853                                     | 140377236 | 140377286 |
| ADCK2               | NM_052853                                     | 140393150 | 140393200 |
| MRPS33              | NM_053035;NM_016071                           | 140714589 | 140714639 |
|                     |                                               | 141136145 | 141136195 |
|                     |                                               | 141176388 | 141176438 |
| PRSS1               | NM_002769                                     | 142458165 | 142458215 |
| EPHB6               | NM_004445                                     | 142554107 | 142554157 |
| C7orf34             | NM_178829                                     | 142637605 | 142637655 |
| ZYX                 | NM_003461;NM_001010972                        | 143078268 | 143078318 |
| FAM115A             | NM_014719                                     | 143582474 | 143582524 |
| FAM115A             | NM_014719                                     | 143582605 | 143582655 |
| ARHGEF5             | NM_005435                                     | 144076749 | 144076799 |
| CNTNAP2             | NM_014141                                     | 145813041 | 145813091 |
| CNTNAP2             | NM_014141                                     | 148035971 | 148036021 |
| C7orf33             | NM_145304                                     | 148287687 | 148287737 |
| CUL1                | NM_003592                                     | 148480301 | 148480351 |
| ZNF282              | NM_003575                                     | 148921385 | 148921435 |
| ZNF746              | NM_152557;NM_001163474                        | 149170315 | 149170365 |
|                     |                                               | 149410434 | 149410484 |
| ZNF862              | NM_001099220                                  | 149557096 | 149557146 |
|                     |                                               | 149744393 | 149744443 |
|                     |                                               | 149916675 | 149916725 |
| RARRES2             | NM_002889                                     | 150037865 | 150037915 |
| RARRES2             | NM_002889                                     | 150038477 | 150038527 |
| RARRES2             | NM_002889                                     | 150038573 | 150038623 |
| RARRES2             | NM_002889                                     | 150038873 | 150038923 |
| REPIN1              | NM_001099696;NM_013400;NM_014374;NM_001099695 | 150069001 | 150069051 |
|                     |                                               | 150072943 | 150072993 |
| ZNF775              | NM_173680                                     | 150075310 | 150075360 |
| ZNF775              | NM_173680                                     | 150093034 | 150093084 |
| GIMAP8              | NM_175571                                     | 150175775 | 150175825 |
| GIMAP7              | NM_153236                                     | 150211127 | 150211177 |
| GIMAP4              | NM_018326                                     | 150264742 | 150264792 |
| NOS3                | NM_000603                                     | 150708943 | 150708993 |
| SLC4A2              | NM_003040                                     | 150757185 | 150757235 |
| SLC4A2              | NM_003040                                     | 150763791 | 150763841 |
| TMUB1               | NM_001136044;NM_031434                        | 150780292 | 150780342 |
| AGAP3               | NM_001042535;NM_031946                        | 150816988 | 150817038 |
| AGAP3               | NM_031946                                     | 150828078 | 150828128 |
| GBX1                | NM_001098834                                  | 150863944 | 150863994 |
| SMARCD3             | NM_001003802;NM_001003801;NM_003078           | 150939567 | 150939617 |
|                     |                                               | 151000466 | 151000516 |
|                     |                                               | 151001492 | 151001542 |
| NUB1                | NM_016118                                     | 151038717 | 151038767 |
| WDR86               | NM_198285                                     | 151091930 | 151091980 |
| RHEB                | NM_005614                                     | 151217550 | 151217600 |
| PRKAG2              | NM_016203;NM_001040633;NM_024429              | 151301812 | 151301862 |
| PRKAG2              | NM_016203;NM_001040633                        | 151453866 | 151453916 |
| PRKAG2              | NM_001040633;NM_016203                        | 151490448 | 151490498 |

|        |                                  |           |           |
|--------|----------------------------------|-----------|-----------|
| PRKAG2 | NM_016203                        | 151565697 | 151565747 |
|        |                                  | 152564273 | 152564323 |
|        |                                  | 152594611 | 152594661 |
|        |                                  | 152597074 | 152597124 |
|        |                                  | 152625135 | 152625185 |
|        |                                  | 152716653 | 152716703 |
|        |                                  | 152720125 | 152720175 |
|        |                                  | 153446701 | 153446751 |
| DPP6   | NM_130797;NM_001039350;NM_001936 | 154685798 | 154685848 |
|        |                                  | 155166529 | 155166579 |
|        |                                  | 155166594 | 155166644 |
|        |                                  | 155241660 | 155241710 |
|        |                                  | 155246663 | 155246713 |
| EN2    | NM_001427                        | 155249503 | 155249553 |
| EN2    | NM_001427                        | 155249649 | 155249699 |
|        |                                  | 155283792 | 155283842 |
|        |                                  | 155287047 | 155287097 |
| CNPY1  | NM_001103176                     | 155303273 | 155303323 |
|        |                                  | 155366270 | 155366320 |
| C7orf4 | NR_024119                        | 156332807 | 156332857 |
|        |                                  | 156400256 | 156400306 |
|        |                                  | 156400686 | 156400736 |
|        |                                  | 156400754 | 156400804 |
|        |                                  | 156400856 | 156400906 |
|        |                                  | 156400965 | 156401015 |
|        |                                  | 156409033 | 156409083 |
|        |                                  | 156792294 | 156792344 |
|        |                                  | 156797217 | 156797267 |
| MNX1   | NM_005515;NM_001165255           | 156803537 | 156803587 |
| UBE3C  | NM_014671                        | 157053581 | 157053631 |
| UBE3C  | NM_014671                        | 157060843 | 157060893 |
| PTPRN2 | NM_002847;NM_130842;NM_130843    | 157340365 | 157340415 |
| PTPRN2 | NM_002847;NM_130842;NM_130843    | 157357778 | 157357828 |
| PTPRN2 | NM_002847;NM_130842;NM_130843    | 157447153 | 157447203 |
| PTPRN2 | NM_002847;NM_130842;NM_130843    | 157502595 | 157502645 |
| PTPRN2 | NM_002847;NM_130842;NM_130843    | 157572623 | 157572673 |
| PTPRN2 | NM_002847;NM_130842;NM_130843    | 157584158 | 157584208 |
| PTPRN2 | NM_002847;NM_130842;NM_130843    | 157585070 | 157585120 |
| PTPRN2 | NM_002847;NM_130842;NM_130843    | 157585832 | 157585882 |
| PTPRN2 | NM_002847;NM_130842;NM_130843    | 157633746 | 157633796 |
| PTPRN2 | NM_002847;NM_130842;NM_130843    | 157644135 | 157644185 |
| PTPRN2 | NM_002847;NM_130842;NM_130843    | 157648330 | 157648380 |
| PTPRN2 | NM_002847;NM_130842;NM_130843    | 157689733 | 157689783 |
| PTPRN2 | NM_002847;NM_130842;NM_130843    | 157696814 | 157696864 |
| PTPRN2 | NM_002847;NM_130842;NM_130843    | 158059679 | 158059729 |
| PTPRN2 | NM_002847;NM_130842;NM_130843    | 158157856 | 158157906 |
| PTPRN2 | NM_002847;NM_130842;NM_130843    | 158165880 | 158165930 |
| PTPRN2 | NM_002847;NM_130842;NM_130843    | 158271056 | 158271106 |
| PTPRN2 | NM_002847;NM_130842;NM_130843    | 158277776 | 158277826 |
| PTPRN2 | NM_002847;NM_130842;NM_130843    | 158278015 | 158278065 |
| ESYT2  | NM_020728                        | 158595890 | 158595940 |
| ESYT2  | NM_020728                        | 158607873 | 158607923 |
| WDR60  | NM_018051                        | 158672733 | 158672783 |
| WDR60  | NM_018051                        | 158734605 | 158734655 |
|        |                                  | 158740813 | 158740863 |
|        |                                  | 158799016 | 158799066 |
| VIPR2  | NM_003382                        | 158886124 | 158886174 |
|        |                                  | 159023802 | 159023852 |

**Supplementary Table 3.** Maternally hypomethylated CpGs with two adjacent probes that passed filters one and two. Start and end coordinates are  $\pm 25$ bp from Illumina MAPINFO.

| UCSC REFGENE_NAME | UCSC REFGENE ACCESSION              | START bp | END bp   |
|-------------------|-------------------------------------|----------|----------|
| MAD1L1            | NM_003550;NM_001013837;NM_001013836 | 1883226  | 1883276  |
| MAD1L1            | NM_003550;NM_001013837;NM_001013836 | 1883365  | 1883415  |
| MAD1L1            | NM_003550;NM_001013837;NM_001013836 | 1883395  | 1883445  |
| MAD1L1            | NM_003550;NM_001013837;NM_001013836 | 1883735  | 1883785  |
| MAD1L1            | NM_003550;NM_001013837;NM_001013836 | 1883851  | 1883901  |
| CARD11            | NM_032415                           | 3019134  | 3019184  |
| CARD11            | NM_032415                           | 3019235  | 3019285  |
| CARD11            | NM_032415                           | 3019289  | 3019339  |
| CARD11            | NM_032415                           | 3019357  | 3019407  |
| USP42             | NM_032172                           | 6197653  | 6197703  |
| USP42             | NM_032172                           | 6197865  | 6197915  |
|                   |                                     | 16626199 | 16626249 |
|                   |                                     | 16626301 | 16626351 |
|                   |                                     | 16626505 | 16626555 |
|                   |                                     | 20830080 | 20830130 |
|                   |                                     | 20830632 | 20830682 |
| HOXA4             | NM_002141                           | 27169649 | 27169699 |
| HOXA4             | NM_002141                           | 27169715 | 27169765 |
| HOXA4             | NM_002141                           | 27169932 | 27169982 |
| HOXA4             | NM_002141                           | 27170216 | 27170266 |
| HOXA4             | NM_002141                           | 27170288 | 27170338 |
| HOXA4             | NM_002141                           | 27170363 | 27170413 |
| HOXA4             | NM_002141                           | 27170369 | 27170419 |
| HOXA4             | NM_002141                           | 27170387 | 27170437 |
| HOXA4             | NM_002141                           | 27170529 | 27170579 |
| HOXA4             | NM_002141                           | 27170692 | 27170742 |
| HOXA4             | NM_002141                           | 27170730 | 27170780 |
| HOXA4             | NM_002141                           | 27170794 | 27170844 |
| HOXA4             | NM_002141                           | 27170807 | 27170857 |
| HOXA4             | NM_002141                           | 27170855 | 27170905 |
| HOXA4             | NM_002141                           | 27170867 | 27170917 |
| HOXA4             | NM_002141                           | 27170936 | 27170986 |
| HOXA4             | NM_002141                           | 27170969 | 27171019 |
| HOXA4             | NM_002141                           | 27171026 | 27171076 |
| HOXA4             | NM_002141                           | 27171129 | 27171179 |
| PRR15             | NM_175887                           | 29605599 | 29605649 |
| PRR15             | NM_175887                           | 29605783 | 29605833 |
| PRR15             | NM_175887                           | 29605872 | 29605922 |
| PRR15             | NM_175887                           | 29606057 | 29606107 |
| PRR15             | NM_175887                           | 29606264 | 29606314 |
| PRR15             | NM_175887                           | 29606324 | 29606374 |
| RALA              | NM_005402                           | 39662442 | 39662492 |
| RALA              | NM_005402                           | 39662739 | 39662789 |
| GLI3              | NM_000168                           | 42277925 | 42277975 |
| GLI3              | NM_000168                           | 42278042 | 42278092 |
| GLI3              | NM_000168                           | 42278052 | 42278102 |
| GLI3              | NM_000168                           | 42278064 | 42278114 |
| GLI3              | NM_000168                           | 42278071 | 42278121 |
|                   |                                     | 51539489 | 51539539 |
|                   |                                     | 51539558 | 51539608 |
|                   |                                     | 73093770 | 73093820 |
| DNAJC30           | NM_032317                           | 73095421 | 73095471 |
| UPK3B             | NM_182684;NM_030570                 | 76145607 | 76145657 |

|            |                                                                |           |           |
|------------|----------------------------------------------------------------|-----------|-----------|
| UPK3B      | NM_182684;NM_030570                                            | 76145647  | 76145697  |
| SGCE;PEG10 | NM_001099400;NM_001099401;NM_001040152;<br>NM_003919;NM_015068 | 94284495  | 94284545  |
| SGCE;PEG10 | NM_001099400;NM_001099401;NM_001040152;<br>NM_003919;NM_015068 | 94284501  | 94284551  |
| PON1       | NM_000446                                                      | 94953628  | 94953678  |
| PON1       | NM_000446                                                      | 94953655  | 94953705  |
| PON1       | NM_000446                                                      | 94953745  | 94953795  |
| PON1       | NM_000446                                                      | 94953785  | 94953835  |
| PON1       | NM_000446                                                      | 94953852  | 94953902  |
| PON1       | NM_000446                                                      | 94953931  | 94953981  |
| PON1       | NM_000446                                                      | 94954034  | 94954084  |
| PON1       | NM_000446                                                      | 94954119  | 94954169  |
| PON1       | NM_000446                                                      | 94954177  | 94954227  |
| ZKSCAN1    | NM_003439                                                      | 99630954  | 99631004  |
| ZKSCAN1    | NM_003439                                                      | 99630973  | 99631023  |
| PCOLCE     | NM_002593                                                      | 10019978  | 10020028  |
| PCOLCE     | NM_002593                                                      | 100199984 | 100200034 |
| SRRT       | NM_015908;NM_001128852;NM_001128853;NM_001128854               | 100480513 | 100480563 |
| SRRT       | NM_015908;NM_001128852;NM_001128853;NM_001128854               | 100480564 | 100480614 |
|            |                                                                | 100946086 | 100946136 |
|            |                                                                | 100946767 | 100946817 |
| SH2B2      | NM_020979                                                      | 101944250 | 101944300 |
| SH2B2      | NM_020979                                                      | 101944405 | 101944455 |
| SH2B2      | NM_020979                                                      | 101944531 | 101944581 |
| SH2B2      | NM_020979                                                      | 101961771 | 101961821 |
| SH2B2      | NM_020979                                                      | 101962087 | 101962137 |
| SH2B2      | NM_020979                                                      | 101962098 | 101962148 |
| SND1       | NM_014390                                                      | 127672633 | 127672683 |
| SND1       | NM_014390                                                      | 127673013 | 127673063 |
| SLC13A4    | NM_012450                                                      | 135412998 | 135413048 |
| SLC13A4    | NM_012450                                                      | 135413074 | 135413124 |
| ADCK2      | NM_052853                                                      | 140377236 | 140377286 |
| ADCK2      | NM_052853                                                      | 140393150 | 140393200 |
| FAM115A    | NM_014719                                                      | 143582474 | 143582524 |
| FAM115A    | NM_014719                                                      | 143582605 | 143582655 |
| RARRES2    | NM_002889                                                      | 150038477 | 150038527 |
| RARRES2    | NM_002889                                                      | 150038573 | 150038623 |
| RARRES2    | NM_002889                                                      | 150038873 | 150038923 |
|            |                                                                | 152594611 | 152594661 |
|            |                                                                | 152597074 | 152597124 |
|            |                                                                | 155166529 | 155166579 |
|            |                                                                | 155166594 | 155166644 |
|            |                                                                | 156400686 | 156400736 |
|            |                                                                | 156400754 | 156400804 |
|            |                                                                | 156400856 | 156400906 |
|            |                                                                | 156400965 | 156401015 |

**Supplementary Table 4.** M values for maternally hypermethylated CpGs that passed filter three. Start and end coordinates are  $\pm 25$ bp from Illumina MAPINFO. The median M values for matUPD7s and controls and the M value for the patUPD7 are listed.

| UCSC REFGENE NAME | CpG ID     | Start    | End      | matUPD7s | Controls | patUPD7 |
|-------------------|------------|----------|----------|----------|----------|---------|
| RPS2P32           | cg12829142 | 23529974 | 23530024 | 0,4454   | -0,8084  | -3,1989 |
| RPS2P32           | cg09424415 | 23530215 | 23530265 | -0,5862  | -1,0523  | -1,6004 |
| RPS2P32           | cg15839482 | 23530424 | 23530474 | 0,4135   | -0,2888  | -0,6429 |
| RPS2P32           | cg05487769 | 23530608 | 23530658 | 1,1609   | 0,9905   | 0,8648  |
| RPS2P32           | cg26074723 | 23530664 | 23530714 | 0,2965   | 0,0012   | -0,7741 |
| RPS2P32           | cg16204552 | 23530785 | 23530835 | 2,9308   | 1,4666   | -0,1155 |
| GRB10             | cg09150232 | 50849614 | 50849664 | 3,7212   | 1,2703   | 0,5144  |
| GRB10             | cg16349612 | 50849698 | 50849748 | 3,2331   | 0,3761   | -1,7568 |
| GRB10             | cg23742152 | 50849780 | 50849830 | 5,4742   | 0,0615   | -5,4945 |
| GRB10             | cg08835688 | 50849906 | 50849956 | 3,0468   | 0,2067   | -3,0035 |
| GRB10             | cg12903171 | 50850539 | 50850589 | 3,8841   | -0,4932  | -3,1278 |
| GRB10             | cg24977055 | 50850845 | 50850895 | 3,3654   | -0,0190  | -3,1915 |
| SGCE;PEG10        | cg14388858 | 94285495 | 94285545 | -3,9344  | -4,7301  | -5,4439 |
| PEG10;SGCE        | cg19107595 | 94285617 | 94285667 | -0,3894  | -1,0157  | -2,8512 |
| PEG10;SGCE        | cg19924104 | 94285647 | 94285697 | 4,0915   | -0,4092  | -3,6614 |
| PEG10;SGCE        | cg11589966 | 94285660 | 94285710 | 1,9310   | -0,0433  | -3,9370 |
| PEG10;SGCE        | cg27435646 | 94285687 | 94285737 | 5,5808   | 0,0885   | -3,9876 |
| SGCE;PEG10        | cg01566785 | 94285720 | 94285770 | 3,5631   | -0,0059  | -4,2288 |
| SGCE;PEG10        | cg05819130 | 94285734 | 94285784 | 2,9110   | 0,2103   | -1,8148 |
| SGCE;PEG10        | cg10105290 | 94285743 | 94285793 | 3,6985   | 0,1921   | -2,9720 |
| SGCE;PEG10        | cg19079047 | 94285752 | 94285802 | 3,7044   | -0,3827  | -5,0764 |
| SGCE;PEG10        | cg02965180 | 94285759 | 94285809 | 5,4540   | 0,1974   | -4,8288 |
| SGCE;PEG10        | cg05277165 | 94285789 | 94285839 | 2,7980   | -0,0217  | -4,0652 |
| SGCE;PEG10        | cg13660372 | 94285848 | 94285898 | 3,1558   | -0,2134  | -2,7361 |
| SGCE;PEG10        | cg06674062 | 94285862 | 94285912 | 3,8937   | -0,2250  | -3,0356 |
| SGCE;PEG10        | cg21778340 | 94285877 | 94285927 | 4,9878   | -0,1108  | -3,4427 |
| SGCE;PEG10        | cg07921535 | 94285886 | 94285936 | 4,5206   | -1,5214  | -5,5179 |
| SGCE;PEG10        | cg09910998 | 94285917 | 94285967 | 3,9419   | -0,0101  | -3,6957 |
| SGCE;PEG10        | cg27393730 | 94285926 | 94285976 | 4,2751   | 0,1803   | -2,1278 |
| SGCE;PEG10        | cg08291000 | 94285935 | 94285985 | 3,4670   | 0,1685   | -3,1932 |
| SGCE;PEG10        | cg27230044 | 94285968 | 94286018 | 4,1216   | 0,1204   | -4,5313 |
| SGCE;PEG10        | cg24885794 | 94286061 | 94286111 | 3,0284   | -0,1225  | -3,0548 |
| SGCE;PEG10        | cg26997085 | 94286085 | 94286135 | 2,3420   | 0,0439   | -2,8337 |
| SGCE;PEG10        | cg22331138 | 94286106 | 94286156 | 3,6324   | 0,7612   | -3,1435 |
| SGCE;PEG10        | cg16492735 | 94286183 | 94286233 | 3,7670   | 0,7156   | -2,9700 |
| SGCE;PEG10        | cg09512080 | 94286194 | 94286244 | 3,6434   | 0,5589   | -3,4477 |
| SGCE;PEG10        | cg00906934 | 94286207 | 94286257 | 3,6059   | 0,3427   | -3,3059 |
| SGCE;PEG10        | cg26503018 | 94286218 | 94286268 | 3,6612   | 0,6933   | -2,9130 |
| SGCE;PEG10        | cg27120649 | 94286236 | 94286286 | 6,0319   | -0,2928  | -5,6528 |
| SGCE;PEG10        | cg21771834 | 94286238 | 94286288 | 2,9319   | 0,6014   | -2,9148 |
| SGCE;PEG10        | cg27001184 | 94286242 | 94286292 | 3,2110   | 0,7124   | -3,4378 |

|              |            |           |           |        |         |         |
|--------------|------------|-----------|-----------|--------|---------|---------|
| SGCE;PEG10   | cg23342787 | 94286269  | 94286319  | 3,6040 | 0,8160  | -3,9516 |
| SGCE;PEG10   | cg14873490 | 94286279  | 94286329  | 5,6025 | 0,1777  | -5,6591 |
| SGCE;PEG10   | cg03384175 | 94286318  | 94286368  | 3,6032 | 0,7407  | -3,6420 |
| SGCE;PEG10   | cg11985632 | 94286326  | 94286376  | 3,6656 | 0,8909  | -3,6097 |
| SGCE;PEG10   | cg13797824 | 94286337  | 94286387  | 3,8840 | 0,7041  | -3,4446 |
| SGCE;PEG10   | cg11175683 | 94286395  | 94286445  | 4,1925 | 0,6406  | -4,2885 |
| SGCE;PEG10   | cg04521244 | 94286406  | 94286456  | 3,9875 | 0,5576  | -3,8977 |
| SGCE;PEG10   | cg11562309 | 94286448  | 94286498  | 3,0992 | 0,5293  | -3,3383 |
| SGCE;PEG10   | cg18898992 | 94286459  | 94286509  | 3,2321 | 0,6597  | -3,3712 |
| SGCE;PEG10   | cg05096321 | 94286486  | 94286536  | 3,6342 | 0,1626  | -3,0141 |
| SGCE;PEG10   | cg19663555 | 94286496  | 94286546  | 2,8435 | 0,5283  | -3,1887 |
| SGCE;PEG10   | cg06695761 | 94286501  | 94286551  | 2,6054 | 0,3517  | -3,3892 |
| SGCE;PEG10   | cg21853542 | 94286534  | 94286584  | 3,4869 | 0,5848  | -3,3422 |
| SGCE;PEG10   | cg04634483 | 94286607  | 94286657  | 3,4962 | 0,2913  | -3,4952 |
| SGCE;PEG10   | cg09890341 | 94286625  | 94286675  | 3,3674 | 0,6792  | -3,3362 |
| SGCE;PEG10   | cg20041873 | 94286644  | 94286694  | 2,8959 | 0,6935  | -2,7610 |
| SGCE;PEG10   | cg04303139 | 94286728  | 94286778  | 2,2573 | -0,0226 | -3,8589 |
| SGCE;PEG10   | cg03436478 | 94286735  | 94286785  | 3,8550 | 0,5189  | -4,1228 |
| SGCE;PEG10   | cg05509218 | 94286768  | 94286818  | 3,3939 | 0,7997  | -3,4498 |
| SGCE;PEG10   | cg22924867 | 94286809  | 94286859  | 3,1694 | 0,2997  | -3,8029 |
| SGCE;PEG10   | cg01169624 | 94286911  | 94286961  | 3,6885 | 0,8333  | -3,0592 |
| SGCE;PEG10   | cg03682823 | 94286928  | 94286978  | 1,6047 | 0,2773  | -2,8623 |
| SGCE;PEG10   | cg18139769 | 94286930  | 94286980  | 2,7076 | 0,2771  | -2,9014 |
| PEG10        | cg12397924 | 94287161  | 94287211  | 5,4048 | -0,7240 | -5,6485 |
| PEG10        | cg15696408 | 94287186  | 94287236  | 3,3212 | -1,2552 | -4,6318 |
| PEG10        | cg22820921 | 94287217  | 94287267  | 4,8950 | -0,6090 | -4,9943 |
| MESTIT1;MEST | cg17706086 | 130129921 | 130129971 | 3,4728 | 2,3578  | 0,7740  |
| MESTIT1;MEST | cg10473158 | 130130097 | 130130147 | 2,8257 | 1,2885  | -1,0662 |
| MESTIT1;MEST | cg05222671 | 130130130 | 130130180 | 3,3347 | 1,5681  | -1,1568 |
| MESTIT1;MEST | cg10767216 | 130130162 | 130130212 | 2,7119 | 1,0556  | -1,4605 |
| MESTIT1;MEST | cg12070022 | 130130164 | 130130214 | 2,5084 | 0,2872  | -2,2040 |
| MESTIT1;MEST | cg15068552 | 130130178 | 130130228 | 3,5083 | 1,2795  | -1,3515 |
| MESTIT1;MEST | cg17347253 | 130130263 | 130130313 | 2,4017 | 0,6335  | -1,5796 |
| MESTIT1;MEST | cg02756856 | 130130295 | 130130345 | 2,8713 | 1,0167  | -1,1950 |
| MESTIT1;MEST | cg26275543 | 130130358 | 130130408 | 3,1013 | 0,4649  | -1,7661 |
| MESTIT1;MEST | cg20826277 | 130130453 | 130130503 | 1,4413 | 0,1340  | -1,3868 |
| MESTIT1;MEST | cg14584935 | 130130456 | 130130506 | 2,4614 | 0,2102  | -1,4320 |
| MESTIT1;MEST | cg24941047 | 130130563 | 130130613 | 4,0278 | 1,6768  | -0,5461 |
| MESTIT1;MEST | cg07427065 | 130130571 | 130130621 | 2,5197 | 0,1968  | -2,0592 |
| MESTIT1;MEST | cg02501418 | 130130715 | 130130765 | 3,7215 | 0,5350  | -2,9022 |
| MESTIT1;MEST | cg08229366 | 130130722 | 130130772 | 3,1392 | 0,7229  | -2,3543 |
| MESTIT1;MEST | cg07224147 | 130130728 | 130130778 | 5,5834 | 0,1966  | -4,6890 |
| MESTIT1;MEST | cg27417677 | 130130893 | 130130943 | 3,8384 | 0,6216  | -3,7000 |
| MESTIT1;MEST | cg09003373 | 130130970 | 130131020 | 3,6357 | -0,4142 | -3,0907 |
| MESTIT1;MEST | cg14088957 | 130131060 | 130131110 | 3,6712 | -0,3240 | -2,1580 |
| MESTIT1;MEST | cg06100421 | 130131111 | 130131161 | 4,0801 | 0,0085  | -2,3353 |



|               |            |           |           |        |         |         |
|---------------|------------|-----------|-----------|--------|---------|---------|
| MESTIT1;MEST  | cg20297423 | 130131113 | 130131163 | 3,1608 | -0,1209 | -2,5590 |
| MESTIT1;MEST  | cg05369791 | 130131121 | 130131171 | 5,7307 | -0,1749 | -4,3151 |
| MESTIT1;MEST  | cg08734637 | 130131164 | 130131214 | 6,0154 | -0,0685 | -4,1672 |
| MEST;MESTIT1  | cg13917504 | 130131233 | 130131283 | 2,3828 | 0,3072  | -1,9468 |
| MEST;MESTIT1  | cg25407198 | 130131243 | 130131293 | 3,0045 | 0,2954  | -2,4484 |
| MEST;MESTIT1  | cg21667116 | 130131334 | 130131384 | 4,2044 | -0,0167 | -3,2377 |
| MEST;MESTIT1  | cg23156962 | 130131342 | 130131392 | 2,3575 | -0,1647 | -3,3256 |
| MEST;MESTIT1  | cg04678950 | 130131378 | 130131428 | 3,7550 | 0,4880  | -3,6498 |
| MEST;MESTIT1  | cg17079325 | 130131455 | 130131505 | 2,6338 | 0,5025  | -2,9944 |
| MEST;MESTIT1  | cg04344875 | 130131459 | 130131509 | 2,5964 | 0,6285  | -2,7094 |
| MEST;MESTIT1  | cg18934293 | 130131541 | 130131591 | 2,8345 | 0,1846  | -3,7432 |
| MEST;MESTIT1  | cg00286878 | 130131608 | 130131658 | 2,3900 | 0,5290  | -2,7366 |
| MEST;MESTIT1  | cg12347392 | 130131651 | 130131701 | 3,5896 | 0,5836  | -3,8892 |
| MEST;MESTIT1  | cg04786207 | 130131666 | 130131716 | 4,0649 | 0,8836  | -3,3985 |
| MEST;MESTIT1  | cg19386484 | 130131684 | 130131734 | 4,8015 | 0,3830  | -4,1295 |
| MEST;MESTIT1  | cg26708559 | 130131705 | 130131755 | 2,7833 | 0,2172  | -3,1291 |
| MEST;MESTIT1  | cg22705386 | 130131772 | 130131822 | 3,7306 | 0,5751  | -3,5804 |
| MEST;MESTIT1  | cg06212135 | 130131801 | 130131851 | 3,6539 | 0,8060  | -3,1295 |
| MEST;MESTIT1  | cg10249538 | 130131804 | 130131854 | 5,8309 | 0,7352  | -5,6435 |
| MEST;MESTIT1  | cg16823958 | 130131844 | 130131894 | 6,1870 | 0,5694  | -5,7859 |
| MEST;MESTIT1  | cg27338480 | 130131860 | 130131910 | 6,4606 | 0,5926  | -5,2707 |
| MEST;MESTIT1  | cg09080913 | 130131862 | 130131912 | 6,0166 | 0,6314  | -3,6558 |
| MEST;MESTIT1  | cg13104298 | 130131880 | 130131930 | 5,9744 | 0,5892  | -5,8082 |
| MEST;MESTIT1  | cg07315018 | 130131891 | 130131941 | 5,8481 | 0,4037  | -5,3878 |
| MEST;MESTIT1  | cg21629528 | 130131896 | 130131946 | 5,8052 | -0,0667 | -5,8867 |
| MEST;MESTIT1  | cg20050761 | 130131898 | 130131948 | 6,4224 | 0,0493  | -5,5807 |
| MEST;MESTIT1  | cg07870293 | 130131906 | 130131956 | 5,2066 | 0,2244  | -4,5639 |
| MEST;MESTIT1  | cg05556276 | 130132136 | 130132186 | 6,3809 | 0,3601  | -4,7268 |
| MEST;MESTIT1  | cg17580798 | 130132174 | 130132224 | 6,4371 | 0,3348  | -6,1666 |
| MEST;MESTIT1  | cg05862114 | 130132234 | 130132284 | 4,3697 | 0,2314  | -1,9921 |
| MEST;MESTIT1  | cg01784351 | 130132240 | 130132290 | 5,7005 | 0,0489  | -5,3520 |
| MEST;MESTIT1  | cg27589003 | 130132261 | 130132311 | 6,3609 | -0,1313 | -3,1207 |
| MEST;MESTIT1  | cg19344806 | 130132273 | 130132323 | 6,2253 | 0,2890  | -1,7525 |
| MEST;MESTIT1  | cg23714917 | 130132280 | 130132330 | 6,3300 | 0,7428  | -1,7816 |
| MEST;MESTIT1  | cg21200654 | 130132294 | 130132344 | 3,4154 | 0,8692  | -1,2560 |
| MEST;MESTIT1  | cg25519926 | 130132335 | 130132385 | 5,0231 | 0,2253  | -2,1639 |
| MEST;MESTIT1  | cg09462536 | 130132388 | 130132438 | 1,2813 | -0,5308 | -2,8168 |
| MEST;MESTIT1  | cg22592140 | 130132394 | 130132444 | 3,5127 | -0,0733 | -2,9029 |
| MEST;MESTIT1  | cg03588221 | 130132397 | 130132447 | 3,0774 | 0,5376  | -2,1406 |
| MEST; MESTIT1 | cg13986840 | 130132428 | 130132478 | 3,6035 | 0,2749  | -0,5377 |
| MEST          | cg23312013 | 130132702 | 130132752 | 3,0397 | 0,3252  | -1,0063 |
| MEST          | cg14952237 | 130132765 | 130132815 | 3,1078 | 1,2327  | -0,1743 |
| MEST          | cg05260959 | 130133085 | 130133135 | 3,1879 | 0,6747  | -1,0317 |
| SVOPL         | cg05719902 | 138348749 | 138348799 | 1,4419 | 0,1660  | -1,7839 |
| SVOPL         | cg16111924 | 138348956 | 138349006 | 0,9018 | -1,2512 | -2,8790 |
| SVOPL         | cg10184328 | 138349133 | 138349183 | 2,6395 | 1,1710  | -1,7367 |

|              |            |           |           |         |         |         |
|--------------|------------|-----------|-----------|---------|---------|---------|
| <b>SVOPL</b> | cg23085143 | 138349418 | 138349468 | 2,6880  | 0,8999  | -3,3814 |
| <b>HTR5A</b> | cg25780543 | 154862745 | 154862795 | -0,6771 | -0,8980 | -1,4481 |
| <b>HTR5A</b> | cg00852398 | 154862944 | 154862994 | 2,4455  | 0,0834  | -1,1768 |
| <b>HTR5A</b> | cg25058023 | 154863151 | 154863201 | 1,6418  | -0,2294 | -1,4691 |
| <b>HTR5A</b> | cg03024742 | 154863219 | 154863269 | 1,8342  | 0,6371  | -0,0802 |
| <b>HTR5A</b> | cg10538202 | 154863313 | 154863363 | 1,9717  | 0,7109  | 0,3377  |
| <b>HTR5A</b> | cg09623773 | 154863356 | 154863406 | 2,4027  | 0,8672  | 0,4833  |

**Supplementary Table 5.** M values for maternally hypomethylated CpGs that passed filter three. Start and end coordinates are  $\pm 25$ bp from Illumina MAPINFO. The median M values for matUPD7s and controls and the M value for the patUPD7 are listed.

| UCSC REFGENE NAME | CpG ID     | start    | end      | matUPD7s | controls | patUPD |
|-------------------|------------|----------|----------|----------|----------|--------|
| MAD1L1            | cg25814293 | 1883226  | 1883276  | 0,869    | 1,610    | 1,793  |
| MAD1L1            | cg16172923 | 1883365  | 1883415  | 1,810    | 3,063    | 4,284  |
| MAD1L1            | cg16658412 | 1883395  | 1883445  | 0,819    | 1,532    | 2,284  |
| MAD1L1            | cg00589581 | 1883735  | 1883785  | 0,566    | 1,010    | 1,108  |
| MAD1L1            | cg12366968 | 1883851  | 1883901  | -0,086   | 0,239    | 0,391  |
| CARD11            | cg19014792 | 3019134  | 3019184  | 1,104    | 1,480    | 2,168  |
| CARD11            | cg16495448 | 3019235  | 3019285  | 0,371    | 0,754    | 1,303  |
| CARD11            | cg00273359 | 3019289  | 3019339  | -0,261   | 0,090    | 0,452  |
| CARD11            | cg06643466 | 3019357  | 3019407  | -1,338   | -0,927   | -0,709 |
| Intergenic        | cg22526939 | 16626199 | 16626249 | 1,839    | 2,661    | 3,295  |
| Intergenic        | cg24231558 | 16626301 | 16626351 | 0,323    | 1,719    | 2,813  |
| Intergenic        | cg08577607 | 16626505 | 16626555 | 1,156    | 2,022    | 2,202  |
| HOXA4             | cg11532431 | 27169649 | 27169699 | 1,659    | 3,167    | 3,825  |
| HOXA4             | cg00562553 | 27169715 | 27169765 | 1,569    | 2,234    | 2,625  |
| HOXA4             | cg23884241 | 27169932 | 27169982 | 0,075    | 0,365    | 0,592  |
| HOXA4             | cg22997113 | 27170216 | 27170266 | 0,398    | 1,298    | 1,568  |
| HOXA4             | cg04317399 | 27170288 | 27170338 | -1,190   | -0,405   | -0,232 |
| HOXA4             | cg07317062 | 27170363 | 27170413 | -1,226   | -0,031   | 0,146  |
| HOXA4             | cg19142026 | 27170369 | 27170419 | -1,940   | -0,346   | -0,134 |
| HOXA4             | cg11410718 | 27170387 | 27170437 | -1,001   | 0,059    | 0,287  |
| HOXA4             | cg11015251 | 27170529 | 27170579 | -0,604   | 0,002    | 0,190  |
| HOXA4             | cg17457637 | 27170692 | 27170742 | -1,404   | -0,532   | -0,319 |
| HOXA4             | cg03724423 | 27170730 | 27170780 | -1,381   | -0,299   | -0,124 |
| HOXA4             | cg06942814 | 27170794 | 27170844 | -0,114   | 0,339    | 0,437  |
| HOXA4             | cg08657492 | 27170807 | 27170857 | -0,274   | 0,551    | 0,846  |
| HOXA4             | cg04321618 | 27170855 | 27170905 | -1,164   | -0,240   | -0,087 |
| HOXA4             | cg14359292 | 27170867 | 27170917 | -1,817   | -0,575   | -0,239 |
| HOXA4             | cg25952581 | 27170936 | 27170986 | -0,936   | -0,178   | 0,078  |
| HOXA4             | cg24169822 | 27170969 | 27171019 | -1,063   | 0,028    | 0,352  |
| HOXA4             | cg17591595 | 27171026 | 27171076 | 1,001    | 1,492    | 1,865  |
| HOXA4             | cg11908057 | 27171129 | 27171179 | 1,835    | 2,473    | 2,956  |
| PRR15             | cg09635954 | 29605599 | 29605649 | 0,187    | 0,458    | 0,870  |
| PRR15             | cg08900404 | 29605783 | 29605833 | -3,122   | -2,174   | -2,020 |
| PRR15             | cg10580293 | 29605872 | 29605922 | -4,400   | -3,312   | -3,160 |
| PRR15             | cg23363754 | 29606057 | 29606107 | -2,874   | -1,829   | -1,364 |
| PRR15             | cg18451588 | 29606264 | 29606314 | -2,853   | -2,037   | -1,742 |
| PRR15             | cg06868100 | 29606324 | 29606374 | -2,018   | -1,008   | -0,890 |
| GLI3              | cg02483271 | 42277925 | 42277975 | -1,896   | -1,644   | -1,285 |
| GLI3              | cg17588800 | 42278042 | 42278092 | -1,498   | -1,089   | -0,303 |
| GLI3              | cg24497732 | 42278052 | 42278102 | -1,095   | -0,820   | -0,376 |
| GLI3              | cg14396995 | 42278064 | 42278114 | -1,297   | -0,900   | 0,155  |

|                   |            |           |           |        |        |        |
|-------------------|------------|-----------|-----------|--------|--------|--------|
| <b>GLI3</b>       | cg26557756 | 42278071  | 42278121  | 0,320  | 0,870  | 1,850  |
| <b>PON1</b>       | cg07404485 | 94953628  | 94953678  | 0,700  | 1,285  | 2,268  |
| <b>PON1</b>       | cg05342682 | 94953655  | 94953705  | 0,767  | 1,171  | 2,437  |
| <b>PON1</b>       | cg04155289 | 94953745  | 94953795  | 1,942  | 2,310  | 3,422  |
| <b>PON1</b>       | cg19678392 | 94953785  | 94953835  | 0,098  | 0,853  | 3,715  |
| <b>PON1</b>       | cg21856205 | 94953852  | 94953902  | -0,084 | 0,264  | 1,166  |
| <b>PON1</b>       | cg17330251 | 94953931  | 94953981  | -0,059 | 0,850  | 2,815  |
| <b>PON1</b>       | cg01874867 | 94954034  | 94954084  | -0,467 | 0,494  | 2,468  |
| <b>PON1</b>       | cg20119798 | 94954119  | 94954169  | 0,683  | 1,684  | 3,019  |
| <b>PON1</b>       | cg04871131 | 94954177  | 94954227  | 1,986  | 2,571  | 3,969  |
| <b>SH2B2</b>      | cg01723606 | 101944250 | 101944300 | 2,538  | 4,220  | 4,522  |
| <b>SH2B2</b>      | cg07512361 | 101944405 | 101944455 | 0,639  | 1,747  | 1,970  |
| <b>SH2B2</b>      | cg00023808 | 101944531 | 101944581 | 3,062  | 3,188  | 3,625  |
| <b>SH2B2</b>      | cg24707573 | 101961771 | 101961821 | -0,657 | -0,411 | -0,154 |
| <b>SH2B2</b>      | cg17190891 | 101962087 | 101962137 | -0,546 | -0,161 | -0,058 |
| <b>SH2B2</b>      | cg08952306 | 101962098 | 101962148 | 0,136  | 0,399  | 0,557  |
| <b>RARRES2</b>    | cg08580268 | 150038477 | 150038527 | -2,043 | -0,891 | 0,214  |
| <b>RARRES2</b>    | cg17279839 | 150038573 | 150038623 | -1,449 | -0,758 | -0,077 |
| <b>RARRES2</b>    | cg27494647 | 150038873 | 150038923 | -1,707 | -0,853 | 0,822  |
| <b>Intergenic</b> | cg16561657 | 156400686 | 156400736 | -2,886 | -1,465 | -0,598 |
| <b>Intergenic</b> | cg18584424 | 156400754 | 156400804 | -2,220 | -1,337 | -0,707 |
| <b>Intergenic</b> | cg27483342 | 156400856 | 156400906 | -2,168 | -1,262 | -0,841 |
| <b>Intergenic</b> | cg08364137 | 156400965 | 156401015 | -3,571 | -2,362 | -1,601 |

**Supplementary Table 6.** SNPs used for allele specific expression. Heterozygosity frequency for the minor allele for SNPs is according to HapMap in the CEPH and CEU populations.

| <b>Gene</b>  | <b>SNP ID</b> | <b>Heterozygosity frequency</b> |
|--------------|---------------|---------------------------------|
| <b>HOXA4</b> | rs17471888    | 0,019                           |
| <b>HOXA4</b> | rs4722660     | 0,05                            |
| <b>HOXA4</b> | rs1801085     | 0,204                           |
| <b>HOXA4</b> | rs2158218     | 0,051                           |
| <b>GLI3</b>  | rs3735361     | 0,496                           |
| <b>GLI3</b>  | rs3823720     | 0,416                           |
| <b>GLI3</b>  | rs2051935     | 0,354                           |
| <b>GLI3</b>  | rs846266      | 0,531                           |
| <b>SVOPL</b> | rs1614641     | 0,383                           |
| <b>SVOPL</b> | rs3734944     | 0,434                           |
| <b>SVOPL</b> | rs2305816     | 0,398                           |
